# Supplementary material
Source: MDPI journal article supplement (https://www.mdpi.com/2071-1050/14/23/15853)
Supplement: s1 [file s1]

## Supplementary File

Manuscript Title: Logistics Center Location-Inventory-Routing Problem Optimization: A Systematic Review using PRISMA method

**Table S1. Summary of Papers based on the Types of LIRP.**

[illegible]

|                                                  |   |   |   |  |   |   |   |   |
|--------------------------------------------------|---|---|---|--|---|---|---|---|
| (Guo and Li 2014)                                |   |   |   |  |   |   |   | √ |
| (Jha and Shanker 2014)                           | √ |   |   |  |   |   | √ |   |
| (Nekooghadirli et al. 2014)                      |   |   | √ |  | √ |   |   | √ |
| (Seyedhosseini, Bozorgi-Amiri, and Daraei 2014)  | √ |   |   |  |   |   |   | √ |
| (Zhang et al. 2014)                              |   |   | √ |  | √ |   |   | √ |
| (Diabat and Theodorou 2015)                      |   | √ |   |  | √ |   |   |   |
| (Ghani, Shariff, and Zahari 2015)                |   |   | √ |  |   |   | √ |   |
| (Guerrero et al. 2015)                           |   |   | √ |  |   | √ |   | √ |
| (Liu et al. 2015)                                | √ |   |   |  |   |   |   | √ |
| (Aghighi and Malmir 2016)                        |   |   |   |  |   |   |   | √ |
| (Angazi 2016)                                    |   |   | √ |  | √ |   |   | √ |
| (Deng et al. 2016)                               | √ |   |   |  |   |   |   | √ |
| (Fan et al. 2016)                                |   |   |   |  |   |   |   | √ |
| (Ghorbani and Akbari Jokar 2016)                 |   |   | √ |  |   |   |   | √ |
| (Lerhlaly et al. 2016)                           |   |   | √ |  |   |   |   | √ |
| (Moradi Nasab and Amin-Naseri 2016)              |   |   | √ |  | √ |   |   | √ |
| (Riquelme-Rodríguez, Gamache, and Langevin 2016) |   |   | √ |  |   |   | √ |   |
| (Shariff et al. 2016)                            |   |   | √ |  |   | √ |   | √ |
| (Tang, Ji, and Jiang 2016)                       |   |   |   |  |   |   |   | √ |
| (R. Tavakkoli-Moghaddam 2016)                    |   |   | √ |  | √ |   |   | √ |
| (Yuchi et al. 2016)                              |   |   | √ |  |   |   |   | √ |
| (Zhalechian et al. 2016)                         |   |   | √ |  |   |   |   | √ |
| (Abou El Madj et al. 2017)                       |   |   | √ |  |   |   |   | √ |
| (Forouzanfar et al. 2017)                        |   |   | √ |  |   |   |   | √ |
| (Gholamian and Heydari 2017)                     |   |   | √ |  | √ |   |   |   |
| (Habibi, Asadi, and Sadjadi 2017)                |   |   |   |  | √ |   |   | √ |

|                                                  |   |   |   |   |  |   |   |   |   |
|--------------------------------------------------|---|---|---|---|--|---|---|---|---|
| (Hiassat, Diabat, and Rahwan 2017)               |   |   |   | √ |  |   |   |   |   |
| (Nakhjirkan and Mokhatab Rafiei 2017)            |   |   |   | √ |  | √ |   |   | √ |
| (Rayat, Musavi, and Bozorgi-Amiri 2017)          |   |   |   | √ |  | √ |   |   | √ |
| (Zhao and Ke 2017)                               |   |   |   |   |  | √ |   |   | √ |
| (Zheng, Li, and Wu 2017)                         |   |   |   |   |  | √ |   |   | √ |
| (Ahmadi-Javid, Amiri, and Meskar 2018)           |   |   | √ |   |  |   |   |   | √ |
| (Asadi et al. 2018)                              |   |   | √ |   |  |   |   |   |   |
| (Guo et al. 2018)                                |   |   |   |   |  | √ |   |   | √ |
| (Habibi, Asadi, and Sadjadi 2018)                | √ |   |   |   |  |   |   |   | √ |
| (Kaya and Ozkok 2018)                            |   |   |   |   |  |   |   |   | √ |
| (Kechmane, Nsiri, and Baalal 2018)               |   |   |   | √ |  | √ |   |   | √ |
| (Momenikiyai, Ebrahimnejad, and Vahdani 2018)    |   |   |   | √ |  | √ |   |   | √ |
| (Rafie-Majd, Pasandideh, and Naderi 2018)        |   |   |   | √ |  |   | √ |   | √ |
| (Sun et al. 2018)                                |   |   |   | √ |  |   |   |   |   |
| (Tavana et al. 2018)                             |   |   |   | √ |  | √ |   |   | √ |
| (Vahdani et al. 2018)                            |   |   |   | √ |  |   |   |   |   |
| (Chen, Tian, and Yao 2019)                       |   |   |   | √ |  |   |   |   | √ |
| (Fallah-Tafti, Vahdatzad, and Sadegheiyeh 2019)  |   |   | √ |   |  |   |   |   |   |
| (Fatemi Ghomi and Asgarian 2019)                 |   |   |   | √ |  | √ |   |   | √ |
| (Karakostas, Sifaleras, and Georgiadis 2019)     |   |   | √ |   |  | √ |   |   | √ |
| (Manavizadeh, , and 2019)                        |   |   |   | √ |  |   |   |   | √ |
| (Nakhjirkan, Rafiei, and Kashan 2019)            |   | √ |   |   |  |   | √ |   |   |
| (Pourhejazy, Kwon, and Lim 2019)                 |   |   |   | √ |  | √ |   |   |   |
| (Rabbani, Heidari, and Yazdanparast 2019)        |   |   |   | √ |  |   |   | √ |   |
| (Saif-Eddine, El-Beheiry, and El-Kharbotly 2019) |   |   | √ |   |  |   |   |   | √ |
| (Saragih et al. 2019)                            |   |   |   |   |  | √ |   |   | √ |

|                                                         |  |   |   |   |   |   |  |   |
|---------------------------------------------------------|--|---|---|---|---|---|--|---|
| (Zheng, Yin, and Zhang 2019)                            |  |   | √ |   |   |   |  | √ |
| (Biuki, Kazemi, and Alinezhad 2020)                     |  |   |   | √ |   | √ |  | √ |
| (Gholipour, Ashoftehfard, and Mina 2020)                |  |   |   | √ |   | √ |  | √ |
| (Govindan et al. 2020)                                  |  | √ |   |   |   |   |  | √ |
| (Karakostas, Sifaleras, and Georgiadis 2020b)           |  |   | √ |   |   | √ |  | √ |
| (Karakostas, Sifaleras, and Georgiadis 2020a)           |  |   | √ |   | √ |   |  | √ |
| (Kaya and Ozkok 2020)                                   |  |   |   | √ |   |   |  |   |
| (Li, Li, and Wu 2020)                                   |  |   |   |   |   | √ |  | √ |
| (Li and Yang 2020)                                      |  |   | √ |   |   |   |  | √ |
| (Misni, Lee, and Seow 2020)                             |  |   |   |   |   |   |  | √ |
| (Rahbari et al. 2020; Yavari, Enjavi, and Geraeli 2020) |  |   |   | √ |   |   |  | √ |
| (Zandkarimkhani et al. 2020)                            |  |   |   | √ |   | √ |  | √ |
| (Rahbari et al. 2020)                                   |  |   | √ |   |   | √ |  |   |
| (Aghighi et al. 2021)                                   |  |   |   |   |   |   |  | √ |
| (Aloui, Hamani, and Delahoche 2021)                     |  |   |   | √ |   | √ |  | √ |
| (Andrés Guillermo Angarita Monroy a 2021)               |  |   |   | √ |   | √ |  |   |
| (Aydemir-Karadag 2021)                                  |  |   | √ |   |   |   |  | √ |
| (Aymen Aloui 2021)                                      |  |   |   | √ |   | √ |  | √ |
| (Daroudi et al. 2021)                                   |  |   |   | √ |   |   |  | √ |
| (Goodarzian et al. 2021)                                |  |   |   | √ |   | √ |  | √ |
| (Ji et al. 2021)                                        |  |   |   | √ |   | √ |  | √ |
| (Josiah et al. 2021)                                    |  |   |   | √ |   |   |  |   |
| (Khalili Nasr et al. 2021)                              |  |   |   | √ |   | √ |  | √ |
| (Liu et al. 2021)                                       |  |   |   | √ |   |   |  |   |
| (Mahjoob et al. 2021)                                   |  |   |   |   |   | √ |  | √ |
| (Misni and Lee 2021)                                    |  |   |   |   |   |   |  | √ |

|                                                |   |  |   |   |  |   |   |   |
|------------------------------------------------|---|--|---|---|--|---|---|---|
| (Misni, Lee, and Jaini 2021)                   |   |  |   |   |  |   |   | √ |
| (Morales Chavez, Costa, and Sarache 2021)      |   |  |   | √ |  | √ |   |   |
| (Nasr et al. 2021)                             |   |  |   | √ |  | √ |   |   |
| (Rabbani, Mokarrari, and Akbarian-saravi 2021) |   |  |   | √ |  |   |   | √ |
| (Rahbari, Arshadi Khamseh, et al. 2021)        |   |  |   | √ |  | √ |   |   |
| (Rahbari, Razavi Hajiagha, et al. 2021)        |   |  | √ |   |  | √ |   |   |
| (Saragih et al. 2021)                          |   |  |   | √ |  |   | √ | √ |
| (Shafiee Moghadam, Aghsami, and Rabbani 2021)  |   |  |   | √ |  | √ |   | √ |
| (Shima HARATI* 2021)                           |   |  |   | √ |  |   |   | √ |
| (Shu et al. 2021)                              |   |  |   | √ |  | √ |   |   |
| (Song et al. 2021)                             |   |  |   | √ |  |   |   | √ |
| (Tavana et al. 2021)                           |   |  |   | √ |  | √ |   | √ |
| (Wu et al. 2021)                               |   |  | √ |   |  | √ |   |   |
| (Yang et al. 2021)                             | √ |  |   |   |  |   | √ | √ |
| (Yuchi et al. 2021)                            |   |  |   |   |  |   |   | √ |
| (Zarrat Dakhely Parast et al. 2021)            |   |  |   | √ |  | √ |   | √ |
| (Zhu, Wen, and Kaplan 2021)                    |   |  |   |   |  |   |   |   |

**Table S2. Summary of Papers based on the Characteristics of LIRP.**

| Paper                                           | MOP | CLSC | RL | MS | TW | GSCM | HOFV | HEFV | CP | ICRP | TR |
|-------------------------------------------------|-----|------|----|----|----|------|------|------|----|------|----|
| (Ahmadi Javid and Azad 2010)                    |     |      |    |    |    |      |      |      | √  | √    |    |
| (Ma, Yang, and Zhang 2010)                      | √   |      |    |    |    |      |      |      |    | √    |    |
| (Ma and Dai 2010)                               |     |      |    |    |    |      | √    |      |    | √    |    |
| (Wang 2010)                                     |     |      |    |    |    |      | √    |      |    | √    |    |
| (Yang, Ma, and Zhang 2010)                      | √   |      |    |    |    |      |      |      |    | √    |    |
| (Hiassat and Diabat 2011)                       |     |      |    |    |    |      |      |      |    |      |    |
| (Sajjadi and Cheraghi 2011)                     |     |      |    |    |    |      | √    |      |    | √    |    |
| (Shuai, Yanhui, and Lan 2011)                   | √   |      |    |    |    |      |      |      |    |      |    |
| (Ahmadi-Javid and Seddighi 2012)                |     |      |    |    |    |      | √    |      |    |      |    |
| (Wu et al. 2012)                                |     |      |    |    | √  |      |      |      |    |      |    |
| (Guerrero et al. 2013)                          |     |      |    |    |    |      | √    |      | √  | √    |    |
| (Hsieh, Liao, and Ho 2013)                      |     |      |    |    | √  |      | √    |      |    | √    |    |
| (Li et al. 2013)                                |     |      | √  |    |    | √    |      |      |    |      |    |
| (Tavakkoli-Moghaddam 2013)                      | √   |      |    |    |    |      |      |      |    | √    |    |
| (Thi Phuong Nha and Lee 2013)                   |     |      |    | √  |    |      |      |      |    |      |    |
| (Chen et al. 2014)                              |     |      |    |    |    |      |      |      |    | √    |    |
| (Deng et al. 2014)                              | √   |      | √  |    |    |      |      |      |    |      |    |
| (Guo and Li 2014)                               | √   |      |    |    |    |      |      |      |    |      |    |
| (Jha and Shanker 2014)                          |     |      |    |    |    |      | √    |      |    |      |    |
| (Nekooghadirli et al. 2014)                     | √   |      |    |    |    |      |      | √    |    | √    |    |
| (Seyedhosseini, Bozorgi-Amiri, and Daraei 2014) |     |      |    |    | √  |      | √    |      |    | √    |    |
| (Zhang et al. 2014)                             |     |      |    | √  |    |      | √    |      |    | √    |    |



|                                                  |   |   |   |   |   |   |   |   |   |   |  |
|--------------------------------------------------|---|---|---|---|---|---|---|---|---|---|--|
| (Ahmadi-Javid, Amiri, and Meskar 2018)           |   |   |   |   |   |   |   |   |   |   |  |
| (Asadi et al. 2018)                              | √ |   |   | √ |   |   |   |   |   | √ |  |
| (Guo et al. 2018)                                |   | √ | √ |   |   |   |   |   |   |   |  |
| (Habibi, Asadi, and Sadjadi 2018)                |   |   |   |   |   |   |   |   |   | √ |  |
| (Kaya and Ozkok 2018)                            |   |   |   |   |   |   |   |   |   |   |  |
| (Kechmane, Nsiri, and Baalal 2018)               |   |   |   |   |   |   | √ |   |   |   |  |
| (Momenikiyai, Ebrahimnejad, and Vahdani 2018)    | √ |   |   |   | √ |   |   | √ | √ | √ |  |
| (Rafie-Majd, Pasandideh, and Naderi 2018)        |   |   |   |   |   |   |   | √ |   | √ |  |
| (Sun et al. 2018)                                |   |   |   |   |   |   | √ |   |   |   |  |
| (Tavana et al. 2018)                             | √ |   |   | √ |   |   |   |   | √ |   |  |
| (Vahdani et al. 2018)                            | √ |   |   |   | √ |   |   | √ | √ |   |  |
| (Chen, Tian, and Yao 2019)                       |   |   |   | √ | √ |   |   |   | √ |   |  |
| (Fallah-Tafti, Vahdatzad, and Sadegheiyeh 2019)  | √ |   |   |   | √ |   |   | √ |   |   |  |
| (Fatemi Ghomi and Asgarian 2019)                 | √ |   |   |   |   |   | √ |   | √ |   |  |
| (Karakostas, Sifaleras, and Georgiadis 2019)     |   |   |   |   |   |   | √ |   | √ | √ |  |
| (Manavizadeh, , and 2019)                        | √ |   |   |   | √ | √ |   | √ | √ |   |  |
| (Nakhjirkan, Rafiei, and Kashan 2019)            |   |   |   |   |   | √ |   |   |   | √ |  |
| (Pourhejazy, Kwon, and Lim 2019)                 | √ |   |   |   |   |   |   | √ |   |   |  |
| (Rabbani, Heidari, and Yazdanparast 2019)        | √ |   | √ |   |   |   |   | √ |   |   |  |
| (Saif-Eddine, El-Beheiry, and El-Kharbotly 2019) | √ |   |   |   |   |   | √ |   |   |   |  |
| (Saragih et al. 2019)                            |   |   |   |   |   |   | √ |   | √ |   |  |
| (Zheng, Yin, and Zhang 2019)                     |   |   |   |   |   |   |   |   |   | √ |  |
| (Biuki, Kazemi, and Alinezhad 2020)              | √ |   |   |   |   |   |   | √ | √ |   |  |
| (Gholipour, Ashoftehfar, and Mina 2020)          | √ |   |   |   |   | √ |   | √ | √ |   |  |
| (Govindan et al. 2020)                           | √ | √ | √ | √ | √ | √ |   | √ |   |   |  |
| (Karakostas, Sifaleras, and Georgiadis 2020b)    |   |   |   |   |   | √ | √ |   | √ | √ |  |



|                                                         |   |   |   |   |   |   |   |   |   |   |   |
|---------------------------------------------------------|---|---|---|---|---|---|---|---|---|---|---|
| (Karakostas, Sifaleras, and Georgiadis 2020a)           |   |   |   |   |   | ✓ | ✓ | ✓ | ✓ | ✓ |   |
| (Kaya and Ozkok 2020)                                   |   |   |   |   |   |   |   |   | ✓ |   |   |
| (Li, Li, and Wu 2020)                                   | ✓ |   |   |   | ✓ |   | ✓ |   |   |   |   |
| (Li and Yang 2020)                                      |   |   |   |   |   |   |   |   | ✓ |   |   |
| (Misni, Lee, and Seow 2020)                             |   |   | ✓ | ✓ |   |   |   |   |   |   |   |
| (Rahbari et al. 2020; Yavari, Enjavi, and Geraeli 2020) |   |   |   |   |   |   |   |   |   |   | ✓ |
| (Zandkarimkhani et al. 2020)                            | ✓ |   |   |   | ✓ | ✓ |   | ✓ | ✓ |   |   |
| (Rahbari et al. 2020)                                   |   |   |   | ✓ |   |   |   | ✓ |   |   |   |
| (Aghighi et al. 2021)                                   |   |   |   |   |   |   |   |   | ✓ | ✓ |   |
| (Aloui, Hamani, and Delahoche 2021)                     | ✓ |   |   |   |   |   | ✓ |   |   |   |   |
| (Andrés Guillermo Angarita Monroy a 2021)               | ✓ |   |   |   |   |   |   | ✓ |   |   |   |
| (Aydemir-Karadag 2021)                                  | ✓ |   |   |   | ✓ |   |   | ✓ |   |   |   |
| (Aymen Aloui 2021)                                      |   |   |   |   |   |   | ✓ |   |   |   |   |
| (Daroudi et al. 2021)                                   | ✓ |   |   |   |   | ✓ |   |   |   | ✓ |   |
| (Goodarzian et al. 2021)                                | ✓ |   |   | ✓ |   | ✓ |   | ✓ |   |   |   |
| (Ji et al. 2021)                                        | ✓ |   |   |   |   | ✓ |   |   |   |   |   |
| (Josiah et al. 2021)                                    |   |   |   |   |   |   |   | ✓ |   |   |   |
| (Khalili Nasr et al. 2021)                              | ✓ | ✓ | ✓ | ✓ | ✓ | ✓ |   | ✓ | ✓ |   |   |
| (Liu et al. 2021)                                       | ✓ |   |   |   |   |   | ✓ |   |   |   |   |
| (Mahjoob et al. 2021)                                   | ✓ |   |   |   |   | ✓ |   | ✓ |   | ✓ |   |
| (Misni and Lee 2021)                                    |   |   | ✓ |   |   | ✓ |   | ✓ |   |   |   |
| (Misni, Lee, and Jaini 2021)                            | ✓ |   | ✓ |   |   | ✓ |   | ✓ |   |   |   |
| (Morales Chavez, Costa, and Sarache 2021)               | ✓ |   |   | ✓ |   | ✓ |   | ✓ | ✓ |   |   |
| (Nasr et al. 2021)                                      |   |   |   | ✓ |   |   |   |   |   |   | ✓ |
| (Rabbani, Mokarrari, and Akbarian-saravi 2021)          | ✓ |   |   | ✓ |   | ✓ |   | ✓ |   |   |   |
| (Rahbari, Arshadi Khamseh, et al. 2021)                 | ✓ |   |   |   | ✓ | ✓ |   | ✓ |   |   |   |

|                                               |   |   |   |   |   |   |   |   |   |   |  |
|-----------------------------------------------|---|---|---|---|---|---|---|---|---|---|--|
| (Rahbari, Razavi Hajiagha, et al. 2021)       |   |   |   | √ |   |   |   | √ | √ |   |  |
| (Saragih et al. 2021)                         |   |   |   |   |   |   |   |   | √ |   |  |
| (Shafiee Moghadam, Aghsami, and Rabbani 2021) | √ | √ | √ |   |   | √ |   |   | √ |   |  |
| (Shima HARATI* 2021)                          |   |   |   | √ | √ |   |   |   |   |   |  |
| (Shu et al. 2021)                             |   |   |   |   | √ |   |   |   |   |   |  |
| (Song et al. 2021)                            | √ |   |   |   |   |   |   |   | √ |   |  |
| (Tavana et al. 2021)                          | √ |   |   | √ |   | √ |   |   | √ |   |  |
| (Wu et al. 2021)                              |   |   |   |   | √ |   | √ |   |   |   |  |
| (Yang et al. 2021)                            | √ |   |   |   |   |   |   |   |   |   |  |
| (Yuchi et al. 2021)                           | √ | √ | √ |   |   |   | √ |   |   | √ |  |
| (Zarrat Dakhely Parast et al. 2021)           | √ |   | √ |   | √ | √ |   | √ | √ |   |  |
| (Zhu, Wen, and Kaplan 2021)                   |   |   |   |   | √ | √ |   |   |   |   |  |

Table S3. Summary of Papers based on the Optimization Goals of LIRP

| Paper                                           | MOP | Objective |    |    |     |    |      |     |     |    |
|-------------------------------------------------|-----|-----------|----|----|-----|----|------|-----|-----|----|
|                                                 |     | TSCC      | PM | TC | TTD | CS | CEEI | PSI | SCR | SC |
| (Ahmadi Javid and Azad 2010)                    |     | √         |    |    |     |    |      |     |     |    |
| (Ma, Yang, and Zhang 2010)                      | √   | √         |    |    |     | √  |      |     |     |    |
| (Ma and Dai 2010)                               |     | √         |    |    |     |    |      |     |     |    |
| (Wang 2010)                                     |     | √         |    |    |     |    |      |     |     |    |
| (Yang, Ma, and Zhang 2010)                      | √   | √         |    |    |     | √  |      |     |     |    |
| (Hiassat and Diabat 2011)                       |     | √         |    |    |     |    |      |     |     |    |
| (Sajjadi and Cheraghi 2011)                     |     | √         |    |    |     |    |      |     |     |    |
| (Shuai, Yanhui, and Lan 2011)                   | √   | √         |    |    |     | √  |      |     |     |    |
| (Ahmadi-Javid and Seddighi 2012)                |     | √         |    |    |     |    |      |     |     |    |
| (Wu et al. 2012)                                |     | √         |    |    |     |    |      |     |     |    |
| (Guerrero et al. 2013)                          |     | √         |    |    |     |    |      |     |     |    |
| (Hsieh, Liao, and Ho 2013)                      |     | √         |    |    |     |    |      |     |     |    |
| (Li et al. 2013)                                |     | √         |    |    |     |    |      |     |     |    |
| (Tavakkoli-Moghaddam 2013)                      | √   | √         |    |    |     | √  |      |     |     |    |
| (Thi Phuong Nha and Lee 2013)                   |     | √         |    |    |     | √  |      |     |     |    |
| (Chen et al. 2014)                              |     | √         |    |    |     |    |      |     |     |    |
| (Deng et al. 2014)                              | √   | √         |    | √  |     | √  |      |     |     |    |
| (Guo and Li 2014)                               | √   | √         |    |    |     | √  |      |     |     |    |
| (Jha and Shanker 2014)                          |     | √         |    |    |     |    |      |     |     |    |
| (Nekooghadirli et al. 2014)                     | √   | √         |    |    |     | √  |      |     |     |    |
| (Seyedhosseini, Bozorgi-Amiri, and Daraei 2014) |     | √         |    |    |     |    |      |     |     |    |

|                                                  |   |   |   |  |  |   |   |   |   |   |
|--------------------------------------------------|---|---|---|--|--|---|---|---|---|---|
| (Zhang et al. 2014)                              |   | √ |   |  |  |   |   |   |   |   |
| (Diabat and Theodorou 2015)                      |   | √ |   |  |  | √ |   |   |   |   |
| (Ghani, Shariff, and Zahari 2015)                |   | √ |   |  |  |   |   |   |   |   |
| (Guerrero et al. 2015)                           |   | √ |   |  |  |   |   |   |   |   |
| (Liu et al. 2015)                                |   | √ |   |  |  |   |   |   |   |   |
| (Aghighi and Malmir 2016)                        |   | √ |   |  |  |   |   |   |   |   |
| (Angazi 2016)                                    |   | √ |   |  |  |   |   |   |   |   |
| (Deng et al. 2016)                               |   | √ |   |  |  |   |   |   |   |   |
| (Fan et al. 2016)                                | √ | √ |   |  |  | √ |   |   |   |   |
| (Ghorbani and Akbari Jokar 2016)                 |   | √ |   |  |  |   |   |   |   |   |
| (Lerhlaly et al. 2016)                           |   | √ |   |  |  |   | √ |   |   |   |
| (Moradi Nasab and Amin-Naseri 2016)              |   |   | √ |  |  |   |   |   |   |   |
| (Riquelme-Rodríguez, Gamache, and Langevin 2016) |   | √ |   |  |  |   |   |   |   |   |
| (Shariff et al. 2016)                            |   | √ |   |  |  |   |   |   |   |   |
| (Tang, Ji, and Jiang 2016)                       | √ | √ |   |  |  |   | √ |   |   |   |
| (R. Tavakkoli-Moghaddam 2016)                    | √ | √ |   |  |  |   |   |   |   | √ |
| (Yuchi et al. 2016)                              |   | √ |   |  |  |   |   |   |   |   |
| (Zhalechian et al. 2016)                         | √ | √ |   |  |  |   | √ | √ |   |   |
| (Abou El Madj et al. 2017)                       |   | √ |   |  |  |   | √ |   |   |   |
| (Forouzanfar et al. 2017)                        | √ | √ |   |  |  | √ |   |   |   |   |
| (Gholamian and Heydari 2017)                     |   | √ |   |  |  |   |   |   |   |   |
| (Habibi, Asadi, and Sadjadi 2017)                |   | √ |   |  |  |   |   |   |   | √ |
| (Hiassat, Diabat, and Rahwan 2017)               |   | √ |   |  |  |   |   |   |   |   |
| (Nakhjirkan and Mokhatab Rafiei 2017)            |   | √ |   |  |  |   |   |   |   |   |
| (Rayat, Musavi, and Bozorgi-Amiri 2017)          | √ | √ |   |  |  |   |   |   | √ |   |

|                                                  |   |   |   |  |   |   |   |   |   |   |
|--------------------------------------------------|---|---|---|--|---|---|---|---|---|---|
| (Zhao and Ke 2017)                               | √ | √ |   |  |   |   |   |   | √ |   |
| (Zheng, Li, and Wu 2017)                         | √ | √ |   |  |   |   |   |   |   |   |
| (Ahmadi-Javid, Amiri, and Meskar 2018)           |   |   | √ |  |   |   |   |   |   |   |
| (Asadi et al. 2018)                              | √ | √ |   |  |   |   | √ |   |   |   |
| (Guo et al. 2018)                                |   | √ |   |  |   |   |   |   |   |   |
| (Habibi, Asadi, and Sadjadi 2018)                |   | √ |   |  |   |   |   |   |   |   |
| (Kaya and Ozkok 2018)                            |   | √ |   |  |   |   |   |   |   |   |
| (Kechmane, Nsiri, and Baalal 2018)               |   | √ |   |  |   |   |   |   |   |   |
| (Momenikiyai, Ebrahimnejad, and Vahdani 2018)    | √ | √ |   |  |   | √ |   |   |   |   |
| (Rafie-Majd, Pasandideh, and Naderi 2018)        |   | √ |   |  |   |   |   |   |   |   |
| (Sun et al. 2018)                                |   | √ |   |  |   |   |   |   |   |   |
| (Tavana et al. 2018)                             | √ | √ |   |  |   | √ |   |   |   | √ |
| (Vahdani et al. 2018)                            | √ | √ |   |  | √ | √ |   |   |   |   |
| (Chen, Tian, and Yao 2019)                       |   | √ |   |  |   |   |   |   |   |   |
| (Fallah-Tafti, Vahdatzad, and Sadegheiyeh 2019)  | √ | √ |   |  |   |   |   |   | √ |   |
| (Fatemi Ghomi and Asgarian 2019)                 | √ | √ |   |  |   |   |   |   | √ |   |
| (Karakostas, Sifaleras, and Georgiadis 2019)     |   | √ |   |  |   |   |   |   |   |   |
| (Manavizadeh, , and 2019)                        | √ | √ |   |  |   |   | √ |   | √ |   |
| (Nakhjirkan, Rafiei, and Kashan 2019)            |   | √ |   |  |   |   |   |   |   |   |
| (Pourhejazy, Kwon, and Lim 2019)                 | √ |   |   |  | √ |   |   |   | √ |   |
| (Rabbani, Heidari, and Yazdanparast 2019)        | √ | √ |   |  |   |   |   |   | √ |   |
| (Saif-Eddine, El-Beheiry, and El-Kharbotly 2019) | √ | √ |   |  |   |   |   |   | √ |   |
| (Saragih et al. 2019)                            |   | √ |   |  |   |   |   |   |   |   |
| (Zheng, Yin, and Zhang 2019)                     |   | √ |   |  |   |   |   |   |   |   |
| (Biuki, Kazemi, and Alinezhad 2020)              | √ | √ |   |  |   |   | √ | √ |   |   |
| (Gholipour, Ashoftehfar, and Mina 2020)          | √ | √ |   |  |   |   |   |   |   | √ |

|                                                         |   |   |   |  |  |   |   |   |   |   |
|---------------------------------------------------------|---|---|---|--|--|---|---|---|---|---|
| (Govindan et al. 2020)                                  | √ | √ |   |  |  |   | √ |   |   | √ |
| (Karakostas, Sifaleras, and Georgiadis 2020b)           |   | √ |   |  |  |   |   |   |   |   |
| (Karakostas, Sifaleras, and Georgiadis 2020a)           |   | √ |   |  |  |   | √ |   |   |   |
| (Kaya and Ozkok 2020)                                   |   | √ |   |  |  |   |   |   |   |   |
| (Li, Li, and Wu 2020)                                   | √ | √ |   |  |  |   |   |   | √ |   |
| (Li and Yang 2020)                                      |   | √ |   |  |  |   |   |   |   |   |
| (Misni, Lee, and Seow 2020)                             |   | √ |   |  |  |   |   |   |   |   |
| (Rahbari et al. 2020; Yavari, Enjavi, and Geraeli 2020) |   |   | √ |  |  |   |   |   |   |   |
| (Zandkarimkhani et al. 2020)                            | √ | √ |   |  |  |   |   |   |   | √ |
| (Rahbari et al. 2020)                                   |   | √ |   |  |  |   |   |   |   |   |
| (Aghighi et al. 2021)                                   |   | √ |   |  |  |   | √ |   |   |   |
| (Aloui, Hamani, and Delahoche 2021)                     | √ | √ |   |  |  |   | √ |   | √ |   |
| (Andrés Guillermo Angarita Monroy a 2021)               | √ | √ |   |  |  | √ |   |   |   |   |
| (Aydemir-Karadag 2021)                                  | √ | √ |   |  |  |   |   |   | √ |   |
| (Aymen Aloui 2021)                                      |   | √ |   |  |  |   |   |   |   |   |
| (Daroudi et al. 2021)                                   | √ | √ |   |  |  | √ | √ |   |   |   |
| (Goodarzian et al. 2021)                                | √ | √ |   |  |  |   | √ |   |   |   |
| (Ji et al. 2021)                                        | √ | √ |   |  |  |   | √ |   |   |   |
| (Josiah et al. 2021)                                    |   | √ |   |  |  |   |   |   |   |   |
| (Khalili Nasr et al. 2021)                              | √ | √ |   |  |  |   | √ | √ | √ |   |
| (Liu et al. 2021)                                       | √ | √ |   |  |  |   | √ |   |   |   |
| (Mahjoob et al. 2021)                                   | √ | √ |   |  |  |   | √ |   |   |   |
| (Misni and Lee 2021)                                    |   | √ |   |  |  |   |   |   |   |   |
| (Misni, Lee, and Jaini 2021)                            | √ | √ |   |  |  |   | √ |   |   |   |
| (Morales Chavez, Costa, and Sarache 2021)               | √ | √ |   |  |  |   | √ | √ |   |   |

|                                                |   |   |   |  |  |   |   |  |   |  |
|------------------------------------------------|---|---|---|--|--|---|---|--|---|--|
| (Nasr et al. 2021)                             |   | √ |   |  |  |   |   |  |   |  |
| (Rabbani, Mokarrari, and Akbarian-saravi 2021) | √ | √ |   |  |  | √ | √ |  |   |  |
| (Rahbari, Arshadi Khamseh, et al. 2021)        | √ | √ |   |  |  |   | √ |  | √ |  |
| (Rahbari, Razavi Hajiagha, et al. 2021)        |   | √ |   |  |  |   |   |  |   |  |
| (Saragih et al. 2021)                          |   | √ |   |  |  |   |   |  |   |  |
| (Shafiee Moghadam, Aghsami, and Rabbani 2021)  | √ |   | √ |  |  | √ |   |  |   |  |
| (Shima HARATI* 2021)                           |   | √ |   |  |  |   |   |  |   |  |
| (Shu et al. 2021)                              |   | √ |   |  |  |   |   |  |   |  |
| (Song et al. 2021)                             | √ | √ |   |  |  |   |   |  | √ |  |
| (Tavana et al. 2021)                           | √ | √ | √ |  |  |   |   |  |   |  |
| (Wu et al. 2021)                               |   | √ |   |  |  |   |   |  |   |  |
| (Yang et al. 2021)                             | √ | √ |   |  |  |   | √ |  |   |  |
| (Yuchi et al. 2021)                            | √ | √ |   |  |  |   |   |  |   |  |
| (Zarrat Dakhely Parast et al. 2021)            | √ | √ |   |  |  |   |   |  | √ |  |
| (Zhu, Wen, and Kaplan 2021)                    |   | √ |   |  |  |   |   |  |   |  |

**Table S4. Summary of Papers based on the Inventory Policy of LIRP**

| Paper                                           | (Q, R) | (T, S) | FRP | JITD | (R,T) | POT | (R,r) | (S-1,S) |
|-------------------------------------------------|--------|--------|-----|------|-------|-----|-------|---------|
| (Ahmadi Javid and Azad 2010)                    | √      |        |     |      |       |     |       |         |
| (Ma, Yang, and Zhang 2010)                      | √      |        |     | √    |       |     |       |         |
| (Ma and Dai 2010)                               |        | √      |     |      | √     |     |       |         |
| (Wang 2010)                                     | √      |        |     |      |       |     |       |         |
| (Yang, Ma, and Zhang 2010)                      |        |        |     | √    |       |     |       |         |
| (Hiassat and Diabat 2011)                       |        |        |     |      |       |     |       |         |
| (Sajjadi and Cheraghi 2011)                     |        | √      |     |      |       |     |       |         |
| (Shuai, Yanhui, and Lan 2011)                   |        |        |     |      |       |     |       |         |
| (Ahmadi-Javid and Seddighi 2012)                |        |        |     |      |       |     |       |         |
| (Wu et al. 2012)                                |        |        |     |      |       |     |       |         |
| (Guerrero et al. 2013)                          |        |        |     |      | √     |     |       |         |
| (Hsieh, Liao, and Ho 2013)                      | √      |        |     |      |       |     |       |         |
| (Li et al. 2013)                                |        |        |     |      |       |     |       |         |
| (Tavakkoli-Moghaddam 2013)                      | √      |        |     |      |       |     |       |         |
| (Thi Phuong Nha and Lee 2013)                   |        |        |     |      |       |     |       |         |
| (Chen et al. 2014)                              |        |        |     |      | √     |     |       |         |
| (Deng et al. 2014)                              |        |        |     |      |       |     |       |         |
| (Guo and Li 2014)                               |        |        |     |      |       |     |       |         |
| (Jha and Shanker 2014)                          |        |        |     |      |       |     |       |         |
| (Nekooghadirli et al. 2014)                     | √      |        |     |      |       |     |       |         |
| (Seyedhosseini, Bozorgi-Amiri, and Daraei 2014) | √      |        |     |      |       |     |       |         |
| (Zhang et al. 2014)                             |        |        | √   |      |       |     |       |         |
| (Diabat and Theodorou 2015)                     |        |        |     |      |       | √   |       |         |



|                                                  |   |  |  |  |  |  |   |   |
|--------------------------------------------------|---|--|--|--|--|--|---|---|
| (Ghani, Shariff, and Zahari 2015)                |   |  |  |  |  |  |   |   |
| (Guerrero et al. 2015)                           |   |  |  |  |  |  |   |   |
| (Liu et al. 2015)                                | √ |  |  |  |  |  |   |   |
| (Aghighi and Malmir 2016)                        |   |  |  |  |  |  | √ |   |
| (Angazi 2016)                                    |   |  |  |  |  |  | √ |   |
| (Deng et al. 2016)                               |   |  |  |  |  |  | √ |   |
| (Fan et al. 2016)                                |   |  |  |  |  |  |   |   |
| (Ghorbani and Akbari Jokar 2016)                 |   |  |  |  |  |  |   |   |
| (Lerhlaly et al. 2016)                           |   |  |  |  |  |  |   |   |
| (Moradi Nasab and Amin-Naseri 2016)              |   |  |  |  |  |  |   |   |
| (Riquelme-Rodríguez, Gamache, and Langevin 2016) |   |  |  |  |  |  |   |   |
| (Shariff et al. 2016)                            |   |  |  |  |  |  |   |   |
| (Tang, Ji, and Jiang 2016)                       | √ |  |  |  |  |  |   |   |
| (R. Tavakkoli-Moghaddam 2016)                    |   |  |  |  |  |  |   |   |
| (Yuchi et al. 2016)                              |   |  |  |  |  |  |   |   |
| (Zhalechian et al. 2016)                         | √ |  |  |  |  |  |   |   |
| (Abou El Madj et al. 2017)                       |   |  |  |  |  |  |   |   |
| (Forouzanfar et al. 2017)                        | √ |  |  |  |  |  |   |   |
| (Gholamian and Heydari 2017)                     |   |  |  |  |  |  |   | √ |
| (Habibi, Asadi, and Sadjadi 2017)                |   |  |  |  |  |  |   | √ |
| (Hiassat, Diabat, and Rahwan 2017)               |   |  |  |  |  |  |   |   |
| (Nakhjirkan and Mokhatab Rafiei 2017)            | √ |  |  |  |  |  |   |   |
| (Rayat, Musavi, and Bozorgi-Amiri 2017)          |   |  |  |  |  |  | √ |   |
| (Zhao and Ke 2017)                               |   |  |  |  |  |  |   |   |
| (Zheng, Li, and Wu 2017)                         |   |  |  |  |  |  |   |   |
| (Ahmadi-Javid, Amiri, and Meskar 2018)           |   |  |  |  |  |  |   |   |

|                                                  |   |   |   |   |   |  |  |   |
|--------------------------------------------------|---|---|---|---|---|--|--|---|
| (Asadi et al. 2018)                              |   |   |   |   |   |  |  | √ |
| (Guo et al. 2018)                                |   |   |   |   |   |  |  |   |
| (Habibi, Asadi, and Sadjadi 2018)                |   |   |   |   |   |  |  | √ |
| (Kaya and Ozkok 2018)                            |   |   |   |   |   |  |  |   |
| (Kechmane, Nsiri, and Baalal 2018)               |   |   |   |   |   |  |  |   |
| (Momenikiyai, Ebrahimnejad, and Vahdani 2018)    | √ |   |   |   |   |  |  |   |
| (Rafie-Majd, Pasandideh, and Naderi 2018)        | √ |   |   |   |   |  |  |   |
| (Sun et al. 2018)                                |   |   |   |   |   |  |  |   |
| (Tavana et al. 2018)                             |   |   |   |   |   |  |  |   |
| (Vahdani et al. 2018)                            |   |   |   |   |   |  |  |   |
| (Chen, Tian, and Yao 2019)                       |   |   |   |   |   |  |  |   |
| (Fallah-Tafti, Vahdatzad, and Sadegheiyeh 2019)  |   |   |   |   |   |  |  |   |
| (Fatemi Ghomi and Asgarian 2019)                 |   |   |   |   |   |  |  |   |
| (Karakostas, Sifaleras, and Georgiadis 2019)     |   |   | √ |   |   |  |  |   |
| (Manavizadeh, , and 2019)                        |   |   |   |   |   |  |  |   |
| (Nakhjirkan, Rafiei, and Kashan 2019)            | √ |   |   |   |   |  |  |   |
| (Pourhejazy, Kwon, and Lim 2019)                 |   |   |   |   |   |  |  |   |
| (Rabbani, Heidari, and Yazdanparast 2019)        |   |   |   |   |   |  |  |   |
| (Saif-Eddine, El-Beheiry, and El-Kharbotly 2019) |   |   |   |   |   |  |  |   |
| (Saragih et al. 2019)                            |   |   |   |   |   |  |  |   |
| (Zheng, Yin, and Zhang 2019)                     |   | √ |   |   | √ |  |  |   |
| (Biuki, Kazemi, and Alinezhad 2020)              |   |   |   |   |   |  |  |   |
| (Gholipour, Ashoftehfar, and Mina 2020)          |   |   |   |   |   |  |  |   |
| (Govindan et al. 2020)                           |   |   |   |   |   |  |  |   |
| (Karakostas, Sifaleras, and Georgiadis 2020b)    |   |   | √ |   |   |  |  |   |
| (Karakostas, Sifaleras, and Georgiadis 2020a)    |   |   |   | √ |   |  |  |   |

|                                                         |   |  |  |  |  |  |   |  |
|---------------------------------------------------------|---|--|--|--|--|--|---|--|
| (Kaya and Ozkok 2020)                                   |   |  |  |  |  |  |   |  |
| (Li, Li, and Wu 2020)                                   |   |  |  |  |  |  |   |  |
| (Li and Yang 2020)                                      |   |  |  |  |  |  |   |  |
| (Misni, Lee, and Seow 2020)                             |   |  |  |  |  |  |   |  |
| (Rahbari et al. 2020; Yavari, Enjavi, and Geraeli 2020) |   |  |  |  |  |  |   |  |
| (Zandkarimkhani et al. 2020)                            |   |  |  |  |  |  |   |  |
| (Rahbari et al. 2020)                                   |   |  |  |  |  |  |   |  |
| (Aghighi et al. 2021)                                   |   |  |  |  |  |  | √ |  |
| (Aloui, Hamani, and Delahoche 2021)                     |   |  |  |  |  |  |   |  |
| (Andrés Guillermo Angarita Monroy a 2021)               |   |  |  |  |  |  |   |  |
| (Aydemir-Karadag 2021)                                  |   |  |  |  |  |  |   |  |
| (Aymen Aloui 2021)                                      |   |  |  |  |  |  |   |  |
| (Daroudi et al. 2021)                                   | √ |  |  |  |  |  |   |  |
| (Goodarzian et al. 2021)                                |   |  |  |  |  |  |   |  |
| (Ji et al. 2021)                                        |   |  |  |  |  |  |   |  |
| (Josiah et al. 2021)                                    |   |  |  |  |  |  |   |  |
| (Khalili Nasr et al. 2021)                              |   |  |  |  |  |  |   |  |
| (Liu et al. 2021)                                       |   |  |  |  |  |  |   |  |
| (Mahjoob et al. 2021)                                   | √ |  |  |  |  |  |   |  |
| (Misni and Lee 2021)                                    |   |  |  |  |  |  |   |  |
| (Misni, Lee, and Jaini 2021)                            |   |  |  |  |  |  |   |  |
| (Morales Chavez, Costa, and Sarache 2021)               |   |  |  |  |  |  |   |  |
| (Nasr et al. 2021)                                      |   |  |  |  |  |  |   |  |
| (Rabbani, Mokarrari, and Akbarian-saravi 2021)          |   |  |  |  |  |  |   |  |
| (Rahbari, Arshadi Khamseh, et al. 2021)                 |   |  |  |  |  |  |   |  |
| (Rahbari, Razavi Hajiagha, et al. 2021)                 |   |  |  |  |  |  |   |  |

|                                               |   |  |  |  |  |  |  |  |
|-----------------------------------------------|---|--|--|--|--|--|--|--|
| (Saragih et al. 2021)                         |   |  |  |  |  |  |  |  |
| (Shafiee Moghadam, Aghsami, and Rabbani 2021) |   |  |  |  |  |  |  |  |
| (Shima HARATI* 2021)                          |   |  |  |  |  |  |  |  |
| (Shu et al. 2021)                             |   |  |  |  |  |  |  |  |
| (Song et al. 2021)                            |   |  |  |  |  |  |  |  |
| (Tavana et al. 2021)                          |   |  |  |  |  |  |  |  |
| (Wu et al. 2021)                              |   |  |  |  |  |  |  |  |
| (Yang et al. 2021)                            |   |  |  |  |  |  |  |  |
| (Yuchi et al. 2021)                           | √ |  |  |  |  |  |  |  |
| (Zarrat Dakhely Parast et al. 2021)           |   |  |  |  |  |  |  |  |
| (Zhu, Wen, and Kaplan 2021)                   |   |  |  |  |  |  |  |  |

**Table S5. List of Algorithms employed in selected Papers for LIRP**

| Paper                                           | Algorithm/Approaches                                                                                                                                                                                            |
|-------------------------------------------------|-----------------------------------------------------------------------------------------------------------------------------------------------------------------------------------------------------------------|
| (Ahmadi Javid and Azad 2010)                    | Tabu Search(TS) and Simulated Annealing(SA)                                                                                                                                                                     |
| (Ma, Yang, and Zhang 2010)                      | Particle swarm optimization(PSO) algorithm                                                                                                                                                                      |
| (Ma and Dai 2010)                               | Genetic Algorithm(GA)+ C-W algorithm                                                                                                                                                                            |
| (Wang 2010)                                     | Nested lagrangian relaxation-based solution algorithm                                                                                                                                                           |
| (Yang, Ma, and Zhang 2010)                      | Particle Swarm Optimization (PSO) algorithm                                                                                                                                                                     |
| (Hiassat and Diabat 2011)                       | General Algebraic Modeling System (GAMS)                                                                                                                                                                        |
| (Sajjadi and Cheraghi 2011)                     | Two phase heuristic Simulated Annealing(SA)                                                                                                                                                                     |
| (Shuai, Yanhui, and Lan 2011)                   | Improved Genetic Algorithm(IGA)                                                                                                                                                                                 |
| (Ahmadi-Javid and Seddighi 2012)                | Simulated Annealing(SA)+Supplier-Distribution Allocation (SDA)+Ant Colony System (ACS) algorithm                                                                                                                |
| (Wu et al. 2012)                                | Relax-and-fix method                                                                                                                                                                                            |
| (Guerrero et al. 2013)                          | Hybrid heuristic                                                                                                                                                                                                |
| (Hsieh, Liao, and Ho 2013)                      | GA+ K-means cluster method                                                                                                                                                                                      |
| (Li et al. 2013)                                | Hybrid Genetic-Simulated Annealing Algorithm(HGSAA)                                                                                                                                                             |
| (Tavakkoli-Moghaddam 2013)                      | LINGO                                                                                                                                                                                                           |
| (Thi Phuong Nha and Lee 2013)                   | Global supply chain network                                                                                                                                                                                     |
| (Chen et al. 2014)                              | Two-stage heuristic algorithm based on Tabu Search (TS)                                                                                                                                                         |
| (Deng et al. 2014)                              | Simulated Annealing Genetic Algorithms (SAGA)                                                                                                                                                                   |
| (Guo and Li 2014)                               | Improved Adaptive Genetic Algorithm(IAGA)                                                                                                                                                                       |
| (Jha and Shanker 2014)                          | Two-phase Iterative approach                                                                                                                                                                                    |
| (Nekooghadirli et al. 2014)                     | Multi-objective Imperialist Competitive Algorithm (MOICA)+ Multi-objective Parallel Simulated Annealing (MOPSA)+Non-dominated Sorting Genetic Algorithm II(NSGA-II) + Pareto Archived Evolution Strategy (PAES) |
| (Seyedhosseini, Bozorgi-Amiri, and Daraei 2014) | LINGO+Genetic Meta-heuristic Algorithm(GMA)                                                                                                                                                                     |

|                                                  |                                                                                                                         |
|--------------------------------------------------|-------------------------------------------------------------------------------------------------------------------------|
| (Zhang et al. 2014)                              | Granular Tabu Search (GTS) heuristic+Hybrid metaheuristic                                                               |
| (Diabat and Theodorou 2015)                      | CPLEX                                                                                                                   |
| (Ghani, Shariff, and Zahari 2015)                | P-center                                                                                                                |
| (Guerrero et al. 2015)                           | Column Generation+Lagrangian relaxation+Local search(heuristic)                                                         |
| (Liu et al. 2015)                                | Pseudo-parallel Genetic Algorithm Integrating Simulated Annealing (PPGASA)                                              |
| (Aghighi and Malmir 2016)                        | Simulated Annealing(SA)                                                                                                 |
| (Angazi 2016)                                    | General Algebraic Modeling System (GAMS)                                                                                |
| (Deng et al. 2016)                               | Hybrid Ant Colony Optimization (HACO) algorithm                                                                         |
| (Fan et al. 2016)                                | Hybrid Genetic Simulated Annealing Algorithm(HGSAA)                                                                     |
| (Ghorbani and Akbari Jokar 2016)                 | Imperialist Competitive-Simulated Annealing (IC-SA) algorithm                                                           |
| (Lerhlaly et al. 2016)                           | CPLEX                                                                                                                   |
| (Moradi Nasab and Amin-Naseri 2016)              | ILOG OPL Studio 3.6                                                                                                     |
| (Riquelme-Rodríguez, Gamache, and Langevin 2016) | Exchange algorithm+Adaptive large neighborhood search algorithm                                                         |
| (Shariff et al. 2016)                            | P-centers                                                                                                               |
| (Tang, Ji, and Jiang 2016)                       | Multi-objective Particle Swarm Optimization (MOPSO) (heuristic)                                                         |
| (R. Tavakkoli-Moghaddam 2016)                    | General Algebraic Modeling System (GAMS)+CPLEX                                                                          |
| (Yuchi et al. 2016)                              | New Tabu Search (NTS) algorithm                                                                                         |
| (Zhalechian et al. 2016)                         | Hybrid metaheuristic algorithm                                                                                          |
| (Abou El Madj et al. 2017)                       | Simulations                                                                                                             |
| (Forouzanfar et al. 2017)                        | Multi-objective Parallel Simulated Annealing (MOPSA)+Non-dominated Sorting Genetic Algorithm II(NSGA-II)+Taguchi method |
| (Gholamian and Heydari 2017)                     | Multi-Echelon Technique for Recoverable Item Control (METRIC) + Simulated Annealing(SA) + Genetic Algorithm(GA)         |
| (Habibi, Asadi, and Sadjadi 2017)                | Simulated+Taguchi method+Annealing algorithm                                                                            |
| (Hiassat, Diabat, and Rahwan 2017)               | Genetic Algorithm(GA)                                                                                                   |
| (Nakhjirkan and Mokhtab Rafiei 2017)             | General Algebraic Modeling System (GAMS) +CPLEX +Genetic Algorithm(GA)                                                  |

|                                                 |                                                                                                                                                               |
|-------------------------------------------------|---------------------------------------------------------------------------------------------------------------------------------------------------------------|
| (Rayat, Musavi, and Bozorgi-Amiri 2017)         | Archived Multi-Objective Simulated Annealing (AMOSA) +Taguchi method                                                                                          |
| (Zhao and Ke 2017)                              | CPLEX                                                                                                                                                         |
| (Zheng, Li, and Wu 2017)                        | Genetic Algorithm(GA)+Non-dominated Sorting Genetic Algorithm II(NSGA-II)                                                                                     |
| (Ahmadi-Javid, Amiri, and Meskar 2018)          | Branch-and-price algorithm                                                                                                                                    |
| (Asadi et al. 2018)                             | Multi-objective Particle Swarm Optimization(MOPSO)+Non-dominated Sorting Genetic Algorithm II(NSGA-II)                                                        |
| (Guo et al. 2018)                               | Simulated Annealing(SA)+Genetic Algorithm(GA)                                                                                                                 |
| (Habibi, Asadi, and Sadjadi 2018)               | Simulated Annealing (SA)+ Genetic Algorithm (GA) + Firefly Algorithm (FA),                                                                                    |
| (Kaya and Ozkok 2018)                           | Simulated Annealing(SA)                                                                                                                                       |
| (Kechmane, Nsiri, and Baalal 2018)              | Genetic Algorithm(GA)                                                                                                                                         |
| (Momenikiyai, Ebrahimnejad, and Vahdani 2018)   | Multi-objective Parallel Simulated Annealing (MOPSA)+Non-dominated Sorting Genetic Algorithm II(NSGA-II)+ Pareto Envelope-based Selection Algorithm (PESA)-II |
| (Rafie-Majd, Pasandideh, and Naderi 2018)       | Lagrangian Relaxation Method +Heuristic algorithm                                                                                                             |
| (Sun et al. 2018)                               | LINGO                                                                                                                                                         |
| (Tavana et al. 2018)                            | Non-dominated Sorting Genetic Algorithm II(NSGA-II) +Reference Point based Non-dominated Sorting Genetic Algorithm-II (RPBNSGA-II)                            |
| (Vahdani et al. 2018)                           | Multi-objective Parallel Simulated Annealing (MOPSA)+Non-dominated Sorting Genetic Algorithm II(NSGA-II)                                                      |
| (Chen, Tian, and Yao 2019)                      | Improved Ant Colony Optimization (IACO)                                                                                                                       |
| (Fallah-Tafti, Vahdatzad, and Sadegheiyeh 2019) | General Algebraic Modeling System (GAMS)                                                                                                                      |
| (Fatemi Ghomi and Asgarian 2019)                | Bio-geographical based optimization (BBO) algorithm+Particle Swarm Optimization (PSO)+CPLEX                                                                   |
| (Karakostas, Sifaleras, and Georgiadis 2019)    | General Variable Neighborhood Search (GVNS) algorithm                                                                                                         |
| (Manavizadeh, , and 2019)                       | Multi-objective Gray Wolf Optimization (MOGWO) algorithm+Non-dominated Sorting Genetic Algorithm II(NSGA-II)                                                  |
| (Nakhjirkan, Rafiei, and Kashan 2019)           | General Algebraic Modeling System (GAMS)+Genetic Algorithm(GA)                                                                                                |

|                                                         |                                                                                                      |
|---------------------------------------------------------|------------------------------------------------------------------------------------------------------|
| (Pourhejazy, Kwon, and Lim 2019)                        | Non-dominated Sorting Genetic Algorithm II(NSGA-II)                                                  |
| (Rabbani, Heidari, and Yazdanparast 2019)               | Non-dominated Sorting Genetic Algorithm II(NSGA-II)+Monte Carlo simulation                           |
| (Saif-Eddine, El-Beheiry, and El-Kharbotly 2019)        | Improved Genetic Algorithm (IGA)                                                                     |
| (Saragih et al. 2019)                                   | Simulated Annealing(SA)                                                                              |
| (Zheng, Yin, and Zhang 2019)                            | Generalized Benders Decomposition (GBD) method                                                       |
| (Biuki, Kazemi, and Alinezhad 2020)                     | Genetic Algorithm(GA)+Particle Swarm Optimization (PSO)                                              |
| (Gholipour, Ashoftehfar, and Mina 2020)                 | General Algebraic Modeling System (GAMS)+CPLEX                                                       |
| (Govindan et al. 2020)                                  | Fuzzy AnalysisNetwork Process (FANP)+Fuzzy Decisionmaking Trial and Evaluation Laboratory (FDEMATEL) |
| (Karakostas, Sifaleras, and Georgiadis 2020b)           | CPLEX+General Variable Neighborhood Search(GVNS)(metaheuristic)                                      |
| (Karakostas, Sifaleras, and Georgiadis 2020a)           | General Variable Neighborhood Search (GVNS)                                                          |
| (Kaya and Ozkok 2020)                                   | Simulated Annealing (SA)heuristic approach                                                           |
| (Li, Li, and Wu 2020)                                   | Multi-objective Ant Colony Optimization (MACO)                                                       |
| (Li and Yang 2020)                                      | Improved Tabu Search(ITS) algorithm                                                                  |
| (Misni, Lee, and Seow 2020)                             | Hybrid Harmony Search-Simulated Annealing (HS-SA) algorithm                                          |
| (Rahbari et al. 2020; Yavari, Enjavi, and Geraeli 2020) | Genetic Algorithm (GA) metaheuristic)                                                                |
| (Zandkarimkhani et al. 2020)                            | General Algebraic Modeling System (GAMS)+CPLEX                                                       |
| (Rahbari et al. 2020)                                   | General Algebraic Modeling System (GAMS)                                                             |
| (Aghighi et al. 2021)                                   | General Algebraic Modeling System (GAMS) + Improved Genetic Algorithm (IGA)                          |
| (Aloui, Hamani, and Delahoche 2021)                     | K-means Clustering+Genetic Algorithm(GA)                                                             |



|                                                |                                                                                                                                                                                                               |
|------------------------------------------------|---------------------------------------------------------------------------------------------------------------------------------------------------------------------------------------------------------------|
| (Andrés Guillermo Angarita Monroy a 2021)      | Non-dominated Sorting Genetic Algorithm version II (NSGA-II)+ Strength Pareto Evolutionary Algorithm version II (SPEA-II) + Genetic Algorithm (GA)                                                            |
| (Aydemir-Karadag 2021)                         | Bi-Objective Adaptive Large Neighborhood Search Algorithm (BOALNS)                                                                                                                                            |
| (Aymen Aloui 2021)                             | CPLEX                                                                                                                                                                                                         |
| (Daroudi et al. 2021)                          | Non-dominated Sorting Genetic Algorithm II(NSGA-II)+ Pareto Envelope-based Selection Algorithm II (PESA-II)                                                                                                   |
| (Goodarzian et al. 2021)                       | Hybrid Firefly Algorithm and Simulated Annealing (HFFA-SA) + Hybrid Firefly Algorithm and Social Engineering Optimization (HFFASEO)                                                                           |
| (Ji et al. 2021)                               | A multi-objective particle swarm optimization (MOPSO) heuristic solution procedure                                                                                                                            |
| (Josiah et al. 2021)                           | General Algebraic Modeling System (GAMS)                                                                                                                                                                      |
| (Khalili Nasr et al. 2021)                     | General Algebraic Modeling System (GAMS)                                                                                                                                                                      |
| (Liu et al. 2021)                              | YALMIP MATLAB toolbox                                                                                                                                                                                         |
| (Mahjoob et al. 2021)                          | Non-dominated Sorting Genetic Algorithms II (NSGA-II)+Non-dominated Ranked Genetic algorithm (NRGA)+Strength Pareto Evolutionary Algorithm II(SPEA-II)+ Pareto Envelope-based Selection Algorithm II(PESA-II) |
| (Misni and Lee 2021)                           | Modified Harmony Search (MHS) algorithm +Multi-local Neighbourhood Search Techniques.                                                                                                                         |
| (Misni, Lee, and Jaini 2021)                   | Multi-Objective Hybrid Harmony Search-Simulated Annealing (MOHS-SA) algorithm                                                                                                                                 |
| (Morales Chavez, Costa, and Sarache 2021)      | Simulated Annealing(SA) algorithm                                                                                                                                                                             |
| (Nasr et al. 2021)                             | Lagrangian Relaxation +Genetic Algorithm (GA)                                                                                                                                                                 |
| (Rabbani, Mokarrari, and Akbarian-saravi 2021) | Lexicographic+AUGMECON2 approaches+TOPSIS method                                                                                                                                                              |
| (Rahbari, Arshadi Khamseh, et al. 2021)        | Multi-objective Black Widow Optimization (MOBWO) algorithm                                                                                                                                                    |
| (Rahbari, Razavi Hajiagha, et al. 2021)        | General Algebraic Modeling System (GAMS)                                                                                                                                                                      |
| (Saragih et al. 2021)                          | Simulated Annealing(SA) algorithm                                                                                                                                                                             |
| (Shafiee Moghadam, Aghsami, and Rabbani 2021)  | Hybrid Two-level Non-dominated Sort Genetic Algorithm.                                                                                                                                                        |
| (Shima HARATI* 2021)                           | Two variability criteria(PLDM and PLDT)                                                                                                                                                                       |
| (Shu et al. 2021)                              | Improved Ant Colony Optimization(IACO)                                                                                                                                                                        |

|                                     |                                                              |
|-------------------------------------|--------------------------------------------------------------|
| (Song et al. 2021)                  | Lagrange Relaxation and Modified Genetic Algorithm (LR-MGA)  |
| (Tavana et al. 2021)                | General Algebraic Modeling System (GAMS)+CPLEX               |
| (Wu et al. 2021)                    | Simulated Annealing(SA)                                      |
| (Yang et al. 2021)                  | Non-dominated Sorting Genetic Algorithms(NSGA)-III algorithm |
| (Yuchi et al. 2021)                 | Tabu Search(TS) +Simulated Annealing(SA)                     |
| (Zarrat Dakhely Parast et al. 2021) | General Algebraic Modeling System (GAMS)+CPLEX               |
| (Zhu, Wen, and Kaplan 2021)         | Improved Genetic Algorithm (IGA)                             |

**Table S6: Summary of Papers based on the Model and Solution Approaches of LIRP**

| Paper                                           | model | Exact | Heuristic/Metaheuristic | Others Approaches |
|-------------------------------------------------|-------|-------|-------------------------|-------------------|
| (Ahmadi Javid and Azad 2010)                    | MIP   |       | √                       |                   |
| (Ma, Yang, and Zhang 2010)                      | MIP   |       | √                       |                   |
| (Ma and Dai 2010)                               | MIP   |       | √                       |                   |
| (Wang 2010)                                     | MINLP | √     |                         |                   |
| (Yang, Ma, and Zhang 2010)                      | MINLP |       | √                       |                   |
| (Hiassat and Diabat 2011)                       | MIP   | √     |                         |                   |
| (Sajjadi and Cheraghi 2011)                     | MILP  |       | √                       |                   |
| (Shuai, Yanhui, and Lan 2011)                   | MILP  |       | √                       |                   |
| (Ahmadi-Javid and Seddighi 2012)                | MIP   |       | √                       |                   |
| (Wu et al. 2012)                                | MILP  |       |                         | √                 |
| (Guerrero et al. 2013)                          | MILP  |       | √                       |                   |
| (Hsieh, Liao, and Ho 2013)                      | MILP  |       | √                       |                   |
| (Li et al. 2013)                                | MILP  |       | √                       |                   |
| (Tavakkoli-Moghaddam 2013)                      | MINLP | √     |                         |                   |
| (Thi Phuong Nha and Lee 2013)                   | MILP  | √     |                         |                   |
| (Chen et al. 2014)                              | MIP   |       | √                       |                   |
| (Deng et al. 2014)                              | MIP   |       | √                       |                   |
| (Guo and Li 2014)                               | MIP   |       | √                       |                   |
| (Jha and Shanker 2014)                          | MIP   |       | √                       |                   |
| (Nekooghadirli et al. 2014)                     | MIP   |       | √                       |                   |
| (Seyedhosseini, Bozorgi-Amiri, and Daraei 2014) | MINLP | √     | √                       |                   |
| (Zhang et al. 2014)                             | MILP  |       | √                       |                   |
| (Diabat and Theodorou 2015)                     | MINLP | √     |                         |                   |

|                                                  |       |   |   |   |
|--------------------------------------------------|-------|---|---|---|
| (Ghani, Shariff, and Zahari 2015)                | MIP   | √ |   |   |
| (Guerrero et al. 2015)                           | MIP   | √ | √ |   |
| (Liu et al. 2015)                                | MIP   |   | √ |   |
| (Aghighi and Malmir 2016)                        | MIP   |   | √ |   |
| (Angazi 2016)                                    | MINLP | √ |   |   |
| (Deng et al. 2016)                               | MINLP |   | √ |   |
| (Fan et al. 2016)                                | MIP   |   | √ |   |
| (Ghorbani and Akbari Jokar 2016)                 | MIP   |   | √ |   |
| (Lerhlaly et al. 2016)                           | MILP  | √ |   |   |
| (Moradi Nasab and Amin-Naseri 2016)              | MILP  | √ |   |   |
| (Riquelme-Rodríguez, Gamache, and Langevin 2016) | MIP   |   | √ |   |
| (Shariff et al. 2016)                            | MILP  | √ |   |   |
| (Tang, Ji, and Jiang 2016)                       | MIP   |   | √ |   |
| (R. Tavakkoli-Moghaddam 2016)                    | MILP  | √ |   |   |
| (Yuchi et al. 2016)                              | MINLP |   | √ |   |
| (Zhalechian et al. 2016)                         | MINLP |   | √ |   |
| (Abou El Madj et al. 2017)                       | MINLP |   |   | √ |
| (Forouzanfar et al. 2017)                        | MINLP |   | √ |   |
| (Gholamian and Heydari 2017)                     | MIP   |   | √ |   |
| (Habibi, Asadi, and Sadjadi 2017)                | MIP   |   | √ |   |
| (Hiassat, Diabat, and Rahwan 2017)               | MIP   |   | √ |   |
| (Nakhjirkan and Mokhatab Rafiei 2017)            | MINLP | √ | √ |   |
| (Rayat, Musavi, and Bozorgi-Amiri 2017)          | MINLP |   | √ |   |
| (Zhao and Ke 2017)                               | MILP  | √ |   |   |
| (Zheng, Li, and Wu 2017)                         | MINLP |   | √ |   |
| (Ahmadi-Javid, Amiri, and Meskar 2018)           | MILP  | √ |   |   |

|                                                  |       |   |   |   |
|--------------------------------------------------|-------|---|---|---|
| (Asadi et al. 2018)                              | MIP   |   | √ |   |
| (Guo et al. 2018)                                | MINLP |   | √ |   |
| (Habibi, Asadi, and Sadjadi 2018)                | MINLP |   | √ |   |
| (Kaya and Ozkok 2018)                            | MINLP |   | √ |   |
| (Kechmane, Nsiri, and Baalal 2018)               | MILP  |   | √ |   |
| (Momenikiyai, Ebrahimnejad, and Vahdani 2018)    | MINLP |   | √ |   |
| (Rafie-Majd, Pasandideh, and Naderi 2018)        | MINLP | √ | √ |   |
| (Sun et al. 2018)                                | MILP  | √ |   |   |
| (Tavana et al. 2018)                             | MILP  |   | √ |   |
| (Vahdani et al. 2018)                            | MIP   |   | √ |   |
| (Chen, Tian, and Yao 2019)                       | MIP   |   | √ |   |
| (Fallah-Tafti, Vahdatzad, and Sadegheiyeh 2019)  | MILP  | √ |   |   |
| (Fatemi Ghomi and Asgarian 2019)                 | MINLP |   | √ |   |
| (Karakostas, Sifaleras, and Georgiadis 2019)     | MIP   |   | √ |   |
| (Manavizadeh, , and 2019)                        | MINLP |   | √ |   |
| (Nakhjirkan, Rafiei, and Kashan 2019)            | MINLP | √ | √ |   |
| (Pourhejazy, Kwon, and Lim 2019)                 | MIP   |   | √ |   |
| (Rabbani, Heidari, and Yazdanparast 2019)        | MINLP |   | √ |   |
| (Saif-Eddine, El-Beheiry, and El-Kharbotly 2019) | MINLP |   | √ |   |
| (Saragih et al. 2019)                            | MINLP |   | √ |   |
| (Zheng, Yin, and Zhang 2019)                     | MIP   | √ |   |   |
| (Biuki, Kazemi, and Alinezhad 2020)              | MIP   |   | √ |   |
| (Gholipour, Ashoftehfar, and Mina 2020)          | MILP  | √ |   |   |
| (Govindan et al. 2020)                           | MILP  |   |   | √ |
| (Karakostas, Sifaleras, and Georgiadis 2020b)    | MILP  | √ | √ |   |
| (Karakostas, Sifaleras, and Georgiadis 2020a)    | MIP   |   | √ |   |

|                                                         |       |   |   |   |
|---------------------------------------------------------|-------|---|---|---|
| (Kaya and Ozkok 2020)                                   | MINLP |   | √ |   |
| (Li, Li, and Wu 2020)                                   | MILP  |   | √ |   |
| (Li and Yang 2020)                                      | MILP  |   | √ |   |
| (Misni, Lee, and Seow 2020)                             | MIP   |   | √ |   |
| (Rahbari et al. 2020; Yavari, Enjavi, and Geraeli 2020) | MINLP |   | √ |   |
| (Zandkarimkhani et al. 2020)                            | MILP  | √ |   |   |
| (Rahbari et al. 2020)                                   | MILP  | √ |   |   |
| (Aghighi et al. 2021)                                   | MINLP | √ | √ |   |
| (Aloui, Hamani, and Delahoche 2021)                     | MIP   | √ | √ |   |
| (Andrés Guillermo Angarita Monroy a 2021)               | MILP  |   | √ |   |
| (Aydemir-Karadag 2021)                                  | MINLP |   | √ |   |
| (Aymen Aloui 2021)                                      | MILP  | √ |   |   |
| (Daroudi et al. 2021)                                   | MILP  |   | √ |   |
| (Goodarzian et al. 2021)                                | MILP  |   | √ |   |
| (Ji et al. 2021)                                        | MILP  |   | √ |   |
| (Josiah et al. 2021)                                    | MILP  | √ |   |   |
| (Khalili Nasr et al. 2021)                              | MILP  | √ |   |   |
| (Liu et al. 2021)                                       | MIP   | √ |   |   |
| (Mahjoob et al. 2021)                                   | MINLP |   | √ |   |
| (Misni and Lee 2021)                                    | MILP  |   | √ |   |
| (Misni, Lee, and Jaini 2021)                            | MILP  |   | √ |   |
| (Morales Chavez, Costa, and Sarache 2021)               | MINLP |   | √ |   |
| (Nasr et al. 2021)                                      | MILP  | √ | √ |   |
| (Rabbani, Mokarrari, and Akbarian-saravi 2021)          | MINLP |   |   | √ |
| (Rahbari, Arshadi Khamseh, et al. 2021)                 | MILP  |   | √ |   |
| (Rahbari, Razavi Hajiagha, et al. 2021)                 | MILP  | √ |   |   |

|                                               |       |   |   |   |
|-----------------------------------------------|-------|---|---|---|
| (Saragih et al. 2021)                         | MINLP |   | √ |   |
| (Shafiee Moghadam, Aghsami, and Rabbani 2021) | MINLP |   | √ |   |
| (Shima HARATI* 2021)                          | MIP   |   |   | √ |
| (Shu et al. 2021)                             | MILP  |   | √ |   |
| (Song et al. 2021)                            | MINLP | √ | √ |   |
| (Tavana et al. 2021)                          | MILP  | √ |   |   |
| (Wu et al. 2021)                              | MINLP | √ |   |   |
| (Yang et al. 2021)                            | MINLP |   | √ |   |
| (Yuchi et al. 2021)                           | MINLP |   | √ |   |
| (Zarrat Dakhely Parast et al. 2021)           | MILP  | √ |   |   |
| (Zhu, Wen, and Kaplan 2021)                   | MIP   |   | √ |   |

MIP: Mixed Integral Programming; MILP: Mixed Integral Linear Programming; MINLP: Mixed Integral Nonlinear Programming.

**Table S7: Summary of Papers based on the Application of LIRP**

| Paper                                           | ECLS | HSC | PPLN | CCL | ESSC | HUSC | HEL | Others |
|-------------------------------------------------|------|-----|------|-----|------|------|-----|--------|
| (Ahmadi Javid and Azad 2010)                    |      |     |      |     |      |      |     |        |
| (Ma, Yang, and Zhang 2010)                      |      |     |      |     |      |      |     | √      |
| (Ma and Dai 2010)                               |      |     |      |     |      |      |     |        |
| (Wang 2010)                                     |      |     |      |     |      |      |     |        |
| (Yang, Ma, and Zhang 2010)                      |      |     |      |     |      |      |     |        |
| (Hiassat and Diabat 2011)                       |      |     |      |     |      |      |     |        |
| (Sajjadi and Cheraghi 2011)                     |      |     |      |     |      |      |     |        |
| (Shuai, Yanhui, and Lan 2011)                   |      |     |      |     |      |      |     | √      |
| (Ahmadi-Javid and Seddighi 2012)                |      |     |      |     |      |      |     |        |
| (Wu et al. 2012)                                |      |     |      |     |      |      |     |        |
| (Guerrero et al. 2013)                          |      |     |      |     |      |      |     |        |
| (Hsieh, Liao, and Ho 2013)                      |      |     |      |     |      |      |     |        |
| (Li et al. 2013)                                | √    |     |      |     |      |      |     |        |
| (Tavakkoli-Moghaddam 2013)                      |      |     |      |     |      |      |     |        |
| (Thi Phuong Nha and Lee 2013)                   |      |     |      |     |      |      |     |        |
| (Chen et al. 2014)                              | √    |     |      |     |      |      |     |        |
| (Deng et al. 2014)                              | √    |     |      |     |      |      |     |        |
| (Guo and Li 2014)                               | √    |     |      |     |      |      |     |        |
| (Jha and Shanker 2014)                          |      |     |      |     |      |      |     |        |
| (Nekooghadirli et al. 2014)                     |      |     |      |     |      |      |     |        |
| (Seyedhosseini, Bozorgi-Amiri, and Daraei 2014) |      |     |      |     |      |      |     |        |
| (Zhang et al. 2014)                             |      |     |      |     |      |      |     |        |
| (Diabat and Theodorou 2015)                     |      |     |      |     |      |      |     |        |



|                                                  |   |   |   |   |   |  |  |   |
|--------------------------------------------------|---|---|---|---|---|--|--|---|
| (Ghani, Shariff, and Zahari 2015)                |   |   |   |   |   |  |  |   |
| (Guerrero et al. 2015)                           |   |   |   |   |   |  |  |   |
| (Liu et al. 2015)                                | √ |   |   |   |   |  |  |   |
| (Aghighi and Malmir 2016)                        |   |   | √ |   |   |  |  |   |
| (Angazi 2016)                                    |   |   |   |   |   |  |  |   |
| (Deng et al. 2016)                               | √ |   |   |   |   |  |  |   |
| (Fan et al. 2016)                                |   |   |   |   |   |  |  |   |
| (Ghorbani and Akbari Jokar 2016)                 |   |   |   |   |   |  |  |   |
| (Lerhlaly et al. 2016)                           |   | √ |   |   |   |  |  |   |
| (Moradi Nasab and Amin-Naseri 2016)              |   | √ |   |   |   |  |  |   |
| (Riquelme-Rodríguez, Gamache, and Langevin 2016) |   |   |   |   |   |  |  | √ |
| (Shariff et al. 2016)                            |   |   |   | √ |   |  |  |   |
| (Tang, Ji, and Jiang 2016)                       |   | √ |   |   |   |  |  |   |
| (R. Tavakkoli-Moghaddam 2016)                    |   |   |   |   |   |  |  |   |
| (Yuchi et al. 2016)                              |   |   |   |   |   |  |  |   |
| (Zhalechian et al. 2016)                         |   |   |   |   | √ |  |  |   |
| (Abou El Madj et al. 2017)                       |   | √ |   |   |   |  |  |   |
| (Forouzanfar et al. 2017)                        |   |   |   |   | √ |  |  |   |
| (Gholamian and Heydari 2017)                     |   |   |   |   |   |  |  |   |
| (Habibi, Asadi, and Sadjadi 2017)                |   |   |   |   |   |  |  |   |
| (Hiassat, Diabat, and Rahwan 2017)               |   |   | √ |   |   |  |  |   |
| (Nakhjirkan and Mokhatab Rafiei 2017)            |   |   |   |   | √ |  |  |   |
| (Rayat, Musavi, and Bozorgi-Amiri 2017)          |   |   |   |   |   |  |  |   |
| (Zhao and Ke 2017)                               |   | √ |   |   |   |  |  |   |
| (Zheng, Li, and Wu 2017)                         |   |   |   | √ |   |  |  |   |
| (Ahmadi-Javid, Amiri, and Meskar 2018)           |   |   |   |   |   |  |  |   |

|                                                  |  |   |   |  |   |   |   |   |
|--------------------------------------------------|--|---|---|--|---|---|---|---|
| (Asadi et al. 2018)                              |  | √ |   |  |   |   |   |   |
| (Guo et al. 2018)                                |  |   |   |  | √ |   |   |   |
| (Habibi, Asadi, and Sadjadi 2018)                |  | √ |   |  |   |   |   |   |
| (Kaya and Ozkok 2018)                            |  |   |   |  |   |   | √ |   |
| (Kechmane, Nsiri, and Baalal 2018)               |  |   |   |  |   |   |   |   |
| (Momenikiyai, Ebrahimnejad, and Vahdani 2018)    |  |   |   |  |   |   |   |   |
| (Rafie-Majd, Pasandideh, and Naderi 2018)        |  |   | √ |  |   |   |   |   |
| (Sun et al. 2018)                                |  |   | √ |  |   |   |   |   |
| (Tavana et al. 2018)                             |  |   |   |  |   | √ |   |   |
| (Vahdani et al. 2018)                            |  |   |   |  |   | √ |   |   |
| (Chen, Tian, and Yao 2019)                       |  |   | √ |  |   |   |   |   |
| (Fallah-Tafti, Vahdatzad, and Sadegheiyeh 2019)  |  |   |   |  |   |   |   | √ |
| (Fatemi Ghomi and Asgarian 2019)                 |  |   | √ |  |   |   |   |   |
| (Karakostas, Sifaleras, and Georgiadis 2019)     |  |   |   |  |   |   |   |   |
| (Manavizadeh, , and 2019)                        |  |   |   |  | √ |   |   |   |
| (Nakhjirkan, Rafiei, and Kashan 2019)            |  |   |   |  |   |   |   |   |
| (Pourhejazy, Kwon, and Lim 2019)                 |  | √ |   |  |   |   |   |   |
| (Rabbani, Heidari, and Yazdanparast 2019)        |  | √ |   |  |   |   |   |   |
| (Saif-Eddine, El-Beheiry, and El-Kharbotly 2019) |  |   |   |  |   |   |   |   |
| (Saragih et al. 2019)                            |  |   | √ |  |   |   |   |   |
| (Zheng, Yin, and Zhang 2019)                     |  |   |   |  |   |   |   | √ |
| (Biuki, Kazemi, and Alinezhad 2020)              |  |   | √ |  |   |   |   |   |
| (Gholipour, Ashoftehfar, and Mina 2020)          |  |   |   |  | √ |   |   |   |
| (Govindan et al. 2020)                           |  |   |   |  | √ |   |   |   |
| (Karakostas, Sifaleras, and Georgiadis 2020b)    |  | √ |   |  |   |   |   |   |
| (Karakostas, Sifaleras, and Georgiadis 2020a)    |  | √ |   |  |   |   |   |   |

|                                                         |  |   |   |   |   |   |   |  |
|---------------------------------------------------------|--|---|---|---|---|---|---|--|
| (Kaya and Ozkok 2020)                                   |  |   |   |   |   |   | √ |  |
| (Li, Li, and Wu 2020)                                   |  |   |   | √ |   |   |   |  |
| (Li and Yang 2020)                                      |  |   |   |   |   |   |   |  |
| (Misni, Lee, and Seow 2020)                             |  |   |   |   |   |   |   |  |
| (Rahbari et al. 2020; Yavari, Enjavi, and Geraeli 2020) |  |   | √ |   |   |   |   |  |
| (Zandkarimkhani et al. 2020)                            |  |   | √ |   |   |   | √ |  |
| (Rahbari et al. 2020)                                   |  |   | √ |   |   |   |   |  |
| (Aghighi et al. 2021)                                   |  |   | √ |   |   |   |   |  |
| (Aloui, Hamani, and Delahoche 2021)                     |  |   | √ |   |   |   |   |  |
| (Andrés Guillermo Angarita Monroy a 2021)               |  |   |   |   |   | √ |   |  |
| (Aydemir-Karadag 2021)                                  |  | √ |   |   |   |   |   |  |
| (Aymen Aloui 2021)                                      |  |   | √ |   |   |   |   |  |
| (Daroudi et al. 2021)                                   |  |   | √ |   |   |   |   |  |
| (Goodarzian et al. 2021)                                |  |   |   |   |   |   | √ |  |
| (Ji et al. 2021)                                        |  | √ |   |   |   |   |   |  |
| (Josiah et al. 2021)                                    |  |   |   |   |   |   |   |  |
| (Khalili Nasr et al. 2021)                              |  |   |   |   | √ |   |   |  |
| (Liu et al. 2021)                                       |  |   | √ |   |   |   |   |  |
| (Mahjoob et al. 2021)                                   |  |   | √ |   |   |   |   |  |
| (Misni and Lee 2021)                                    |  |   |   |   |   |   |   |  |
| (Misni, Lee, and Jaini 2021)                            |  |   |   |   | √ |   |   |  |
| (Morales Chavez, Costa, and Sarache 2021)               |  | √ |   |   |   |   |   |  |
| (Nasr et al. 2021)                                      |  |   | √ |   |   |   |   |  |
| (Rabbani, Mokarrari, and Akbarian-saravi 2021)          |  |   |   |   |   |   |   |  |
| (Rahbari, Arshadi Khamseh, et al. 2021)                 |  | √ |   |   |   |   |   |  |
| (Rahbari, Razavi Hajiagha, et al. 2021)                 |  |   | √ |   |   |   |   |  |

|                                               |   |  |   |   |   |  |   |  |
|-----------------------------------------------|---|--|---|---|---|--|---|--|
| (Saragih et al. 2021)                         |   |  | √ |   |   |  |   |  |
| (Shafiee Moghadam, Aghsami, and Rabbani 2021) | √ |  |   |   | √ |  |   |  |
| (Shima HARATI* 2021)                          |   |  | √ |   |   |  |   |  |
| (Shu et al. 2021)                             |   |  |   | √ |   |  |   |  |
| (Song et al. 2021)                            |   |  |   |   |   |  |   |  |
| (Tavana et al. 2021)                          |   |  |   |   | √ |  |   |  |
| (Wu et al. 2021)                              |   |  |   |   |   |  |   |  |
| (Yang et al. 2021)                            |   |  |   |   |   |  | √ |  |
| (Yuchi et al. 2021)                           |   |  |   |   | √ |  |   |  |
| (Zarrat Dakhely Parast et al. 2021)           |   |  |   |   | √ |  |   |  |
| (Zhu, Wen, and Kaplan 2021)                   |   |  |   | √ |   |  |   |  |

## References

- Abou El Madj, B., Sanaa Lerhlaly, Maria Lebbar, Hamid Allaoui, Sohaib Afifi, Driss Ouazar, and M. Bouya. 2017. "An inventory location routing model with environmental considerations." Review of. *MATEC Web of Conferences* 105. doi: 10.1051/matecconf/201710500002.
- Aghighi, A., and B. Malmir. 2016. Designing distribution networks of perishable products under stochastic demands and routs. Paper presented at the Proceedings of the International Conference on Industrial Engineering and Operations Management.
- Aghighi, Azam, Alireza Goli, Behnam Malmir, and Erfan Babaee Tirkolaee. 2021. "The stochastic location-routing-inventory problem of perishable products with renegeing and balking." Review of. *Journal of Ambient Intelligence and Humanized Computing*. doi: 10.1007/s12652-021-03524-y.
- Ahmadi-Javid, Amir, Elahe Amiri, and Mahla Meskar. 2018. "A Profit-Maximization Location-Routing-Pricing Problem: A Branch-and-Price Algorithm." Review of. *European Journal of Operational Research* 271 (3):866-81. doi: 10.1016/j.ejor.2018.02.020.
- Ahmadi-Javid, Amir, and Amir Hossein Seddighi. 2012. "A location-routing-inventory model for designing multisource distribution networks." Review of. *ENGINEERING OPTIMIZATION* 44 (6):637-56. doi: 10.1080/0305215X.2011.600756.
- Ahmadi Javid, Amir, and Nader Azad. 2010. "Incorporating location, routing and inventory decisions in supply chain network design." Review of. *Transportation Research Part E: Logistics and Transportation Review* 46 (5):582-97. doi: 10.1016/j.tre.2009.06.005.
- Aloui, Aymen, Nadia Hamani, and Laurent Delahoche. 2021. "An integrated optimization approach using a collaborative strategy for sustainable cities freight transportation: A Case study." Review of. *Sustainable Cities and Society* 75. doi: 10.1016/j.scs.2021.103331.
- Andrés Guillermo Angarita Monroy a, \*, Henry Lamos Díaz 2021. "A parallel programming approach to the solution of the location - inventory and multi-echelon routing problem in the humanitarian supply chain." Review of. *Transportation Research Procedia* 58 (2021):495-502.
- Angazi, Hojat. 2016. "An integrated location inventory routing model in supply chain network designing under uncertainty." Review of. *Decision Science Letters*:551-68. doi: 10.5267/j.dsl.2016.4.001.
- Asadi, Ehsan, Farhad Habibi, Stefan Nickel, and Hadi Sahebi. 2018. "A bi-objective stochastic location-inventory-routing model for microalgae-based biofuel supply chain." Review of. *Applied Energy* 228:2235-61. doi: 10.1016/j.apenergy.2018.07.067.
- Aydemir-Karadag, A. 2021. "Bi-Objective Adaptive Large Neighborhood Search Algorithm for the Healthcare Waste Periodic Location Inventory Routing Problem." Review of. *Arab J Sci Eng*:1-16. doi: 10.1007/s13369-021-06106-4.
- Aymen Aloui , Nassim Mrabti, Nadia Hamani, Laurent Delahoche 2021. "Towards a collaborative and integrated optimization approach in sustainable freight

transportation." Review of. *IFAC PapersOnLine* 54-1 (2021):671–6.

- Biuki, Mehdi, Abolfazl Kazemi, and Alireza Alinezhad. 2020. "An integrated location-routing-inventory model for sustainable design of a perishable products supply chain network." Review of. *Journal of Cleaner Production* 260. doi: 10.1016/j.jclepro.2020.120842.
- Chen, Chao, Zhihui Tian, and Baozhen Yao. 2019. "Optimization of two-stage location-routing-inventory problem with time-windows in food distribution network." Review of. *Annals of Operations Research* 273 (1-2):111–34. doi: 10.1007/s10479-017-2514-3.
- Chen, Dehui, Dongyan Chen, Guanglu Sun, and Guangming Liu. 2014. "Combined Location Routing and Inventory Problem of E-Commerce Distribution System with Fuzzy Random Demand." Review of. *International Journal of Hybrid Information Technology* 7 (5):429–42. doi: 10.14257/ijhit.2014.7.5.39.
- Daroudi, Samaneh, Hamed Kazemipoor, Esmaeel Najafi, and Mohammad Fallah. 2021. "The minimum latency in location routing fuzzy inventory problem for perishable multi-product materials." Review of. *Applied Soft Computing* 110. doi: 10.1016/j.asoc.2021.107543.
- Deng, Shuai, Yanhui Li, Hao Guo, and Bailing Liu. 2016. "Solving a Closed-Loop Location-Inventory-Routing Problem with Mixed Quality Defects Returns in E-Commerce by Hybrid Ant Colony Optimization Algorithm." Review of. *Discrete Dynamics in Nature and Society* 2016. doi: 10.1155/2016/6467812.
- Deng, Shuai, Yanhui Li, Ting Zhou, and Yi Cao. 2014. "Study on Recyclable Reserve Logistics Network Optimization Based on E-Commerce." In *2014 International Conference on Management of e-Commerce and e-Government*, 337–40.
- Diabat, Ali, and Effrosyni Theodorou. 2015. "A location–inventory supply chain problem: Reformulation and piecewise linearization." Review of. *Computers & Industrial Engineering* 90:381–9. doi: 10.1016/j.cie.2015.05.021.
- Fallah-Tafti, A., M. A. Vahdatzad, and A. Sadegheiyeh. 2019. "A comprehensive mathematical model for a location-routing-inventory problem under uncertain demand: A numerical illustration in cash-in-transit sector." Review of. *International Journal of Engineering, Transactions B: Applications* 32 (11):1634–42. doi: 10.5829/ije.2019.32.11b.15.
- Fan, J., X. F. Tian, S. Deng, H. Guo, and Z. L. Zhang. 2016. Multi-objective location-inventory-routing problem based on time-satisfaction degree. Paper presented at the Proceedings of the 6th International Conference on Logistics and Supply Chain Management.
- Fatemi Ghomi, S. M. T., and B. Asgarian. 2019. "Development of metaheuristics to solve a transportation inventory location routing problem considering lost sale for perishable goods." Review of. *Journal of Modelling in Management* 14 (1):175–98. doi: 10.1108/JM2-05-2018-0064.
- Forouzanfar, F., R. Tavakkoli-Moghaddam, M. Bashiri, A. Baboli, and S. M. Hadji Molana. 2017. "New mathematical modeling for a location–routing–inventory problem in a multi-period closed-loop supply chain in a car industry." Review of. *Journal of Industrial Engineering International* 14 (3):537–53. doi: 10.1007/s40092-017-0243-5.
- Ghani, N. E. A., S. S. R. Shariff, and S. M. Zahari. 2015. Optimization of location routing inventory problem with transshipment. Paper presented at the AIP Conference

Proceedings.

- Gholamian, M. R., and M. Heydari. 2017. "An inventory model with METRIC approach in location-routing-inventory problem." Review of. *Advances in Production Engineering & Management* 12 (2):115-26. doi: 10.14743/apem2017.2.244.
- Gholipour, S., A. Ashoftehfard, and H. Mina. 2020. "Green supply chain network design considering inventory-location-routing problem: A fuzzy solution approach." Review of. *International Journal of Logistics Systems and Management* 35 (4):436-52. doi: 10.1504/IJLSM.2020.106272.
- Ghorbani, Atiye, and Mohammad Reza Akbari Jokar. 2016. "A hybrid imperialist competitive-simulated annealing algorithm for a multisource multi-product location-routing-inventory problem." Review of. *Computers & Industrial Engineering* 101:116-27. doi: 10.1016/j.cie.2016.08.027.
- Goodarzian, Fariba, Samuel Fosso Wamba, K. Mathiyazhagan, and Atour Taghipour. 2021. "A new bi-objective green medicine supply chain network design under fuzzy environment: Hybrid metaheuristic algorithms." Review of. *Computers & Industrial Engineering* 160. doi: 10.1016/j.cie.2021.107535.
- Govindan, Kannan, Hassan Mina, Ali Esmaili, and Seyed Mohammad Gholami-Zanjani. 2020. "An Integrated Hybrid Approach for Circular supplier selection and Closed loop Supply Chain Network Design under Uncertainty." Review of. *Journal of Cleaner Production* 242. doi: 10.1016/j.jclepro.2019.118317.
- Guerrero, W. J., C. Prodhon, N. Velasco, and C. A. Amaya. 2013. "Hybrid heuristic for the inventory location-routing problem with deterministic demand." Review of. *International Journal of Production Economics* 146 (1):359-70. doi: 10.1016/j.ijpe.2013.07.025.
- . 2015. "A relax-and-price heuristic for the inventory-location-routing problem." Review of. *International Transactions in Operational Research* 22 (1):129-48. doi: 10.1111/itor.12091.
- Guo, H., and Y. Li. 2014. Multiobjective location-inventory-routing problem taking returns into consideration. Paper presented at the Lecture Notes in Electrical Engineering.
- Guo, Hao, Congdong Li, Ying Zhang, Chunnan Zhang, and Yu Wang. 2018. "A Nonlinear Integer Programming Model for Integrated Location, Inventory, and Routing Decisions in a Closed-Loop Supply Chain." Review of. *Complexity*. doi: 10.1155/2018/2726070.
- Habibi, Farhad, Ehsan Asadi, and Seyed Jafar Sadjadi. 2017. "Developing a location-inventory-routing model using METRIC approach in inventory policy." Review of. *Uncertain Supply Chain Management*:337-58. doi: 10.5267/j.uscm.2017.4.003.
- . 2018. "A location-inventory-routing optimization model for cost effective design of microalgae biofuel distribution system: A case study in Iran." Review of. *Energy Strategy Reviews* 22:82-93. doi: 10.1016/j.esr.2018.08.006.
- Hiassat, A., and A. Diabat. 2011. A location-inventory-routing-problem with perishable products. Paper presented at the 41st International Conference on Computers and Industrial Engineering 2011.
- Hiassat, Abdelhalim, Ali Diabat, and lyad Rahwan. 2017. "A genetic algorithm approach for location-inventory-routing problem with perishable products." Review

of. *Journal of Manufacturing Systems* 42:93-103. doi: 10.1016/j.jmsy.2016.10.004.

Hsieh, C. L., S. H. Liao, and W. C. Ho. 2013. Incorporating location, routing and inventory decisions in dual sales channel - A hybrid genetic approach. Paper presented at the IEEE International Conference on Industrial Engineering and Engineering Management.

Jha, J. K., and Kripa Shanker. 2014. "An integrated inventory problem with transportation in a divergent supply chain under service level constraint." Review of. *Journal of Manufacturing Systems* 33 (4):462-75. doi: 10.1016/j.jmsy.2014.04.002.

Ji, Shoufeng, Jinhuan Tang, Minghe Sun, and Rongjuan Luo. 2021. "MULTI-OBJECTIVE OPTIMIZATION FOR A COMBINED LOCATION-ROUTING-INVENTORY SYSTEM CONSIDERING CARBON-CAPPED DIFFERENCES." Review of. *Journal of Industrial and Management Optimization*. doi: 10.3934/jimo.2021051.

Josiah, T., A. Suhada, P. Chetthamrongchai, H. Purbasari, H. T. Hazim, A. A. P. Shidiq, T. H. Wahyuningsih, I. Y. Potashova, and S. Aravindhan. 2021. "Optimization of the Location, Inventory and Routing of Capacity Vehicles with Interval Uncertainty." Review of. *Industrial Engineering and Management Systems* 20 (4):654-61. doi: 10.7232/iems.2021.20.4.654.

Karakostas, Panagiotis, Angelo Sifaleras, and Michael C. Georgiadis. 2019. "A general variable neighborhood search-based solution approach for the location-inventory-routing problem with distribution outsourcing." Review of. *Computers & Chemical Engineering* 126:263-79. doi: 10.1016/j.compchemeng.2019.04.015.

———. 2020a. "Adaptive variable neighborhood search solution methods for the fleet size and mix pollution location-inventory-routing problem." Review of. *Expert Systems with Applications* 153. doi: 10.1016/j.eswa.2020.113444.

———. 2020b. "Variable neighborhood search-based solution methods for the pollution location-inventory-routing problem." Review of. *Optimization Letters*. doi: 10.1007/s11590-020-01630-y.

Kaya, O., and D. Ozkok. 2018. A network design problem with location, inventory and routing decisions. Paper presented at the GECCO 2018 Companion - Proceedings of the 2018 Genetic and Evolutionary Computation Conference Companion.

Kaya, Onur, and Dogus Ozkok. 2020. "A Blood Bank Network Design Problem with Integrated Facility Location, Inventory and Routing Decisions." Review of. *Networks and Spatial Economics* 20 (3):757-83. doi: 10.1007/s11067-020-09500-x.

Kechmane, Laila, Benayad Nsiri, and Azeddine Baalal. 2018. "Optimization of a Two-Echelon Location Lot-Sizing Routing Problem with Deterministic Demand." Review of. *Mathematical Problems in Engineering* 2018. doi: 10.1155/2018/2745437.

Khalili Nasr, Arash, Madjid Tavana, Behrouz Alavi, and Hassan Mina. 2021. "A novel fuzzy multi-objective circular supplier selection and order allocation model for sustainable closed-loop supply chains." Review of. *Journal of Cleaner Production* 287. doi: 10.1016/j.jclepro.2020.124994.

Lerhlaly, S., M. Lebbar, H. Allaoui, D. Ouazar, and S. Afifi. 2016. "An integrated inventory location routing: Problem considering CO2 emissions." Review of.



*Contemporary Engineering Sciences* 9 (7):303-14. doi: 10.12988/ces.2016.512326.

- Li, Kang, Dan Li, and Daqing Wu. 2020. "Multi-objective Optimization for Location-Routing-Inventory Problem in Cold Chain Logistics Network with Soft Time Window Constraint." Review of. *Journal Européen des Systèmes Automatisés* 53 (6):803-9. doi: 10.18280/jesa.530606.
- Li, Tao, and Wenyin Yang. 2020. "Supply Chain Planning Problem Considering Customer Inventory Holding Cost Based on an Improved Tabu Search Algorithm." Review of. *Applied Mathematics and Nonlinear Sciences* 5 (2):557-64. doi: 10.2478/amns.2020.2.00029.
- Li, Yanhui, Hao Guo, Lin Wang, and Jing Fu. 2013. "A Hybrid Genetic-Simulated Annealing Algorithm for the Location-Inventory-Routing Problem Considering Returns under E-Supply Chain Environment." Review of. *SCIENTIFIC WORLD JOURNAL*. doi: 10.1155/2013/125893.
- Liu, Aijun, Qiuyun Zhu, Lei Xu, Qiang Lu, and Youqing Fan. 2021. "Sustainable supply chain management for perishable products in emerging markets: An integrated location-inventory-routing model." Review of. *Transportation Research Part E: Logistics and Transportation Review* 150. doi: 10.1016/j.tre.2021.102319.
- Liu, Bailing, Hui Chen, Yanhui Li, and Xiang Liu. 2015. "A Pseudo-Parallel Genetic Algorithm Integrating Simulated Annealing for Stochastic Location-Inventory-Routing Problem with Consideration of Returns in E-Commerce." Review of. *Discrete Dynamics in Nature and Society* 2015. doi: 10.1155/2015/586581.
- Ma, H., X. Yang, and D. Zhang. 2010. The research into ILRIP for single-stage logistics distribution network under stochastic demand based on JITD. Paper presented at the 2010 7th International Conference on Service Systems and Service Management, Proceedings of ICSSSM' 10.
- Ma, Z., and Y. Dai. 2010. Stochastic dynamic location-routing-inventory problem in two-echelon multi-product distribution systems. Paper presented at the ICLEM 2010: Logistics for Sustained Economic Development - Infrastructure, Information, Integration - Proceedings of the 2010 International Conference of Logistics Engineering and Management.
- Mahjoob, Meysam, Seyed Sajjad Fazeli, Soodabeh Milanlouei, Ali Kamali Mohammadzadeh, Leyla Sadat Tavassoli, and James S. Noble. 2021. "Green supply chain network design with emphasis on inventory decisions." Review of. *Sustainable Operations and Computers* 2:214-29. doi: 10.1016/j.susoc.2021.07.006.
- Manavizadeh, Neda, Mahnaz Shaabani, and Soroush Aghamohammadi-Bosjin 2019. "Designing a green location routing inventory problem considering transportation risks and time window: a case study." Review of. *Journal of Industrial and Systems Engineering* 12 (4):27-56.
- Misni, F., and L. S. Lee. 2021. "Modified Harmony Search Algorithm for Location-Inventory-Routing Problem in Supply Chain Network Design with Product Returns." Review of. *Malaysian Journal of Mathematical Sciences* 15 (1):1-20.
- Misni, F., L. S. Lee, and N. I. Jaini. 2021. "Multi-objective hybrid harmony search-simulated annealing for location-inventory-routing problem in supply chain network design of reverse logistics with CO2 emission." Review of. *Journal of Physics: Conference Series* 1988 (1). doi: 10.1088/1742-6596/1988/1/012054.
- Misni, Farahanim, Lai Soon Lee, and Hsin-Vonn Seow. 2020. "Hybrid Harmony Search-Simulated Annealing Algorithm for Location-Inventory-Routing Problem in Supply Chain Network Design with Defect and Non-Defect Items." Review of. *Applied Sciences-Basel* 10 (18). doi: 10.3390/app10186625.

- Momenikiyai, Mohammad, Sadoullah Ebrahimnejad, and Behnam Vahdani. 2018. "A BI-OBJECTIVE MATHEMATICAL MODEL FOR INVENTORY-DISTRIBUTION-ROUTING PROBLEM UNDER RISK POOLING EFFECT: ROBUST META-HEURISTICS APPROACH." Review of. *Economic Computation and Economic Cybernetics Studies and Research* 52 (4):257-74. doi: 10.24818/18423264/52.4.18.17.
- Moradi Nasab, N., and M. R. Amin-Naseri. 2016. "Designing an integrated model for a multi-period, multi-echelon and multi-product petroleum supply chain." Review of. *Energy* 114:708-33. doi: 10.1016/j.energy.2016.07.140.
- Morales Chavez, Marcela María, Yasel Costa, and William Sarache. 2021. "A three-objective stochastic location-inventory-routing model for agricultural waste-based biofuel supply chain." Review of. *Computers & Industrial Engineering* 162. doi: 10.1016/j.cie.2021.107759.
- Nakhjirkan, S., and F. Mokhtab Rafiei. 2017. "An integrated multi-echelon supply chain network design considering stochastic demand: A genetic algorithm based solution." Review of. *Promet - Traffic - Traffico* 29 (4):391-400. doi: 10.7307/ptt.v29i4.2193.
- Nakhjirkan, S., F. M. Rafiei, and A. H. Kashan. 2019. "Developing an integrated decision making model in supply chain under demand uncertainty using genetic algorithm and network data envelopment analysis." Review of. *International Journal of Mathematics in Operational Research* 14 (1):53-81. doi: 10.1504/IJMOR.2019.096979.
- Nasr, N., S. T. A. Niaki, A. Hussenzadek Kashan, and M. Seifbarghy. 2021. "An efficient solution method for an agri-fresh food supply chain: hybridization of Lagrangian relaxation and genetic algorithm." Review of. *Environmental Science and Pollution Research*. doi: 10.1007/s11356-021-13718-8.
- Nekooghadirli, N., R. Tavakkoli-Moghaddam, V. R. Ghezavati, and S. Javanmard. 2014. "Solving a new bi-objective location-routing-inventory problem in a distribution network by meta-heuristics." Review of. *Computers & Industrial Engineering* 76:204-21. doi: 10.1016/j.cie.2014.08.004.
- Pourhejazy, Pourya, Oh Kyoung Kwon, and Hyunwoo Lim. 2019. "Integrating Sustainability into the Optimization of Fuel Logistics Networks." Review of. *KSCE Journal of Civil Engineering* 23 (3):1369-83. doi: 10.1007/s12205-019-1373-7.
- R. Tavakkoli-Moghaddam, Z. Raziei. 2016. "A New Bi-Objective Location-Routing-Inventory Problem with Fuzzy Demands." Review of. *IFAC-PapersOnLine* 49-12 (2016):1116-21.
- Rabbani, M., R. Heidari, and R. Yazdanparast. 2019. "A stochastic multi-period industrial hazardous waste location-routing problem: Integrating NSGA-II and Monte Carlo simulation." Review of. *European Journal of Operational Research* 272 (3):945-61. doi: 10.1016/j.ejor.2018.07.024.
- Rabbani, Masoud, Kimiya Rahmani Mokarrari, and Niloofar Akbarian-saravi. 2021. "A multi-objective location inventory routing problem with pricing decisions in a sustainable waste management system." Review of. *Sustainable Cities and Society* 75. doi: 10.1016/j.scs.2021.103319.
- Rafie-Majd, Zahra, Seyed Hamid Reza Pasandideh, and Bahman Naderi. 2018. "Modelling and solving the integrated inventory-location-routing problem in a multi-period and multi-perishable product supply chain with uncertainty: Lagrangian relaxation algorithm." Review of. *Computers & Chemical Engineering* 109:9-

22. doi: 10.1016/j.compchemeng.2017.10.013.

- Rahbari, Misagh, Alireza Arshadi Khamseh, Yaser Sadati-Keneti, and Mohammad Javad Jafari. 2021. "A risk-based green location-inventory-routing problem for hazardous materials: NSGA II, MOSA, and multi-objective black widow optimization." Review of. *Environment, Development and Sustainability*. doi: 10.1007/s10668-021-01555-1.
- Rahbari, Misagh, Seyed Hossein Razavi Hajiagha, Hannan Amoozad Mahdiraji, Farshid Riahi Dorcheh, and Jose Arturo Garza-Reyes. 2021. "A novel location-inventory-routing problem in a two-stage red meat supply chain with logistic decisions: evidence from an emerging economy." Review of. *KYBERNETES*. doi: 10.1108/K-01-2021-0012.
- Rahbari, Misagh, Seyed Hossein Razavi Hajiagha, Mahdi Raei Dehaghi, Mahmoud Moallem, and Farshid Riahi Dorcheh. 2020. "Modeling and solving a five-echelon location-inventory-routing problem for red meat supply chain." Review of. *KYBERNETES* 50 (1):66-99. doi: 10.1108/k-10-2019-0652.
- Rayat, Farnaz, MirMohammad Musavi, and Ali Bozorgi-Amiri. 2017. "Bi-objective reliable location-inventory-routing problem with partial backordering under disruption risks: A modified AMOSA approach." Review of. *Applied Soft Computing* 59:622-43. doi: 10.1016/j.asoc.2017.06.036.
- Riquelme-Rodríguez, Juan-Pablo, Michel Gamache, and André Langevin. 2016. "Location arc routing problem with inventory constraints." Review of. *Computers & Operations Research* 76:84-94. doi: 10.1016/j.cor.2016.06.012.
- Saif-Eddine, Ahmad Sayed, Mohammed Mostafa El-Beheiry, and Amin Kamel El-Kharbotly. 2019. "An improved genetic algorithm for optimizing total supply chain cost in inventory location routing problem." Review of. *Ain Shams Engineering Journal* 10 (1):63-76. doi: 10.1016/j.asej.2018.09.002.
- Sajjadi, Seyed Reza, and S. Hossein Cheraghi. 2011. "Multi-products location routing problem integrated with inventory under stochastic demand." Review of. *International Journal of Industrial and Systems Engineering* 7 (4). doi: 10.1504/ijise.2011.039670.
- Saragih, Nova, Senator Bahagia, Suprayogi Suprayogi, and Ibnu Syabri. 2021. "Location-inventory-routing model with considering urban road networks." Review of. *Journal of Industrial Engineering and Management* 14 (4). doi: 10.3926/jiem.3557.
- Saragih, Nova Indah, Senator Nur Bahagia, Suprayogi, and Ibnu Syabri. 2019. "A heuristic method for location-inventory-routing problem in a three-echelon supply chain system." Review of. *Computers & Industrial Engineering* 127:875-86. doi: 10.1016/j.cie.2018.11.026.
- Seyedhosseini, Seyed Mohammad, Ali Bozorgi-Amiri, and Sahar Daraei. 2014. "An Integrated Location-Routing-Inventory Problem by Considering Supply Disruption." Review of. *iBusiness* 06 (02):29-37. doi: 10.4236/ib.2014.62004.
- Shafiee Moghadam, Shayan, Amir Aghsami, and Masoud Rabbani. 2021. "A hybrid NSGA-II algorithm for the closed-loop supply chain network design in e-commerce." Review of. *RAIRO - Operations Research* 55 (3):1643-74. doi: 10.1051/ro/2021068.
- Shariff, S. S. R., N. S. Kamal, M. Omar, and N. H. Moin. 2016. "Location Routing Inventory Problem with Transshipment Points Using p-center." Review of. *Journal of*

*Industrial Engineering and Management Science* 2016 (1):59-72. doi: 10.13052/jiems2446-1822.2016.004.

- Shima HARATI\*, Emad ROGHANIAN, Ashkan HAFEZALKOTOB, Amir Abbas SHOJAIE 2021. "A Robust Two-Stage Stochastic Location-Routing-Inventory Model for Perishable Items." Review of. *Tehnicki vjesnik - Technical Gazette* 28 (6):1989-95. doi: 10.17559/tv-20200326055958.
- Shu, Bo, Fanghua Pei, Kaifu Zheng, Mengxia Yu, Dalin Zhang, Sabah Mohammed, and Alessandro Calvi. 2021. "LIRP optimization of cold chain logistics in satellite warehouse mode of supermarket chains." Review of. *Journal of Intelligent & Fuzzy Systems* 41 (4):4825-39. doi: 10.3233/jifs-189968.
- Shuai, Deng, Li Yanhui, and Yao Lan. 2011. Combine cost and time satisfaction into a multi-objective programming for integrated logistics system. Paper presented at the 2011 International Conference on Computer Science and Service System (CSSS), 27-29 June 2011.
- Song, Y., Y. Q. Liu, Q. Sun, M. F. Chen, and H. T. Xu. 2021. "A Joint Optimization Model considering the Product User's Risk Preference for Supply System Disruption." Review of. *Mathematical Problems in Engineering* 2021. doi: 10.1155/2021/5081753.
- Sun, Q., S. Chien, D. W. Hu, and B. S. Ma. 2018. Optimizing the Location-Inventory-Routing Problem for Perishable Products Considering Food Waste and Fuel Consumption. Paper presented at the CICTP 2018: Intelligence, Connectivity, and Mobility - Proceedings of the 18th COTA International Conference of Transportation Professionals.
- Tang, Jinhuan, Shoufeng Ji, and Liwen Jiang. 2016. "The Design of a Sustainable Location-Routing-Inventory Model Considering Consumer Environmental Behavior." Review of. *Sustainability* 8 (3). doi: 10.3390/su8030211.
- Tavakkoli-Moghaddam, Reza. 2013. "Incorporating location, routing, and inventory decisions in a bi-objective supply chain design. problem with risk-pooling." Review of. *Journal of Industrial Engineering International*.
- Tavana, M., H. Tohidi, M. Alimohammadi, and R. Lesansalmasi. 2021. "A location-inventory-routing model for green supply chains with low-carbon emissions under uncertainty." Review of. *Environ Sci Pollut Res Int* 28 (36):50636-48. doi: 10.1007/s11356-021-13815-8.
- Tavana, Madjid, Amir-Reza Abtahi, Debora Di Caprio, Reza Hashemi, and Reza Yousefi-Zenouz. 2018. "An integrated location-inventory-routing humanitarian supply chain network with pre- and post-disaster management considerations." Review of. *Socio-Economic Planning Sciences* 64:21-37. doi: 10.1016/j.seps.2017.12.004.
- Thi Phuong Nha, Le, and Tzong-Ru Lee. 2013. "Model selection with considering the CO2 emission alone the global supply chain." Review of. *Journal of Intelligent Manufacturing* 24 (4):653-72. doi: 10.1007/s10845-011-0613-6.
- Vahdani, Behnam, D. Veysmoradi, F. Noori, and F. Mansour. 2018. "Two-stage multi-objective location-routing-inventory model for humanitarian logistics network design under uncertainty." Review of. *International Journal of Disaster Risk Reduction* 27:290-306. doi: 10.1016/j.ijdr.2017.10.015.
- Wang, X. 2010. An integrated multi-depot location- inventory-routing problem for logistics distribution system planning of a chain enterprise. Paper presented at

the 2010 International Conference on Logistics Systems and Intelligent Management, ICLSIM 2010.

- Wu, Tao, Leyuan Shi, Joseph Geunes, and Kerem Akartunali. 2012. "On the equivalence of strong formulations for capacitated multi-level lot sizing problems with setup times." Review of. *JOURNAL OF GLOBAL OPTIMIZATION* 53 (4):615-39. doi: 10.1007/s10898-011-9728-8.
- Wu, Weitiao, Wei Zhou, Yue Lin, Yuanqi Xie, and Wenzhou Jin. 2021. "A hybrid metaheuristic algorithm for location inventory routing problem with time windows and fuel consumption." Review of. *Expert Systems with Applications* 166. doi: 10.1016/j.eswa.2020.114034.
- Yang, X., H. Ma, and D. Zhang. 2010. Research into ILRIP for logistics distribution network of deteriorating item based on JITD. Paper presented at the Communications in Computer and Information Science.
- Yang, Yulei, Jin Zhang, Wenjie Sun, and Yun Pu. 2021. "Research on NSGA-III in Location-routing-inventory problem of pharmaceutical logistics intermodal network." Review of. *Journal of Intelligent & Fuzzy Systems* 41 (1):699-713. doi: 10.3233/jifs-202508.
- Yavari, Mohammad, Hossein Enjavi, and Mohaddese Geraeli. 2020. "Demand management to cope with routes disruptions in location-inventory-routing problem for perishable products." Review of. *Research in Transportation Business & Management* 37. doi: 10.1016/j.rtbm.2020.100552.
- Yuchi, Qunli, Zhengwen He, Zhen Yang, and Nengmin Wang. 2016. "A Location-Inventory-Routing Problem in Forward and Reverse Logistics Network Design." Review of. *Discrete Dynamics in Nature and Society* 2016:1-18. doi: 10.1155/2016/3475369.
- Yuchi, Qunli, Nengmin Wang, Zhengwen He, and Haoxun Chen. 2021. "Hybrid heuristic for the location-inventory-routing problem in closed-loop supply chain." Review of. *International Transactions in Operational Research* 28 (3):1265-95. doi: 10.1111/itor.12621.
- Zandkarimkhani, Shiva, Hassan Mina, Mehdi Biuki, and Kannan Govindan. 2020. "A chance constrained fuzzy goal programming approach for perishable pharmaceutical supply chain network design." Review of. *Annals of Operations Research* 295 (1):425-52. doi: 10.1007/s10479-020-03677-7.
- Zarrat Dakhely Parast, Z., H. Haleh, S. Avakh Darestani, and H. Amin-Tahmasbi. 2021. "Green reverse supply chain network design considering location-routing-inventory decisions with simultaneous pickup and delivery." Review of. *Environ Sci Pollut Res Int*. doi: 10.1007/s11356-021-13770-4.
- Zhalechian, M., R. Tavakkoli-Moghaddam, B. Zahiri, and M. Mohammadi. 2016. "Sustainable design of a closed-loop location-routing-inventory supply chain network under mixed uncertainty." Review of. *Transportation Research Part E: Logistics and Transportation Review* 89:182-214. doi: 10.1016/j.tre.2016.02.011.
- Zhang, Ying, Mingyao Qi, Lixin Miao, and Erchao Liu. 2014. "Hybrid metaheuristic solutions to inventory location routing problem." Review of. *Transportation Research Part E: Logistics and Transportation Review* 70:305-23. doi: 10.1016/j.tre.2014.07.010.
- Zhao, Jiahong, and Ginger Y. Ke. 2017. "Incorporating inventory risks in location-routing models for explosive waste management." Review of. *International Journal of Production Economics* 193:123-36. doi: 10.1016/j.ijpe.2017.07.001.
- Zheng, J., K. Li, and D. Wu. 2017. "Models for Location Inventory Routing Problem of Cold Chain Logistics with NSGA-II Algorithm." Review of. *Journal of Donghua*

*University (English Edition)* 34 (4):533-9.

Zheng, Xiaojin, Meixia Yin, and Yanxia Zhang. 2019. "Integrated optimization of location, inventory and routing in supply chain network design." Review of. *Transportation Research Part B: Methodological* 121:1-20. doi: 10.1016/j.trb.2019.01.003.

Zhu, Anqing, Youyun Wen, and Melike Kaplan. 2021. "Green Logistics Location-Routing Optimization Solution Based on Improved GA Algorithm considering Low-Carbon and Environmental Protection." Review of. *Journal of Mathematics* 2021:1-16. doi: 10.1155/2021/6101194.
